1           **Genome-wide association across *Saccharomyces cerevisiae* strains**  
2           **reveals substantial variation in underlying gene requirements for toxin**  
3           **tolerance.**

4  
5    Maria Sardi<sup>1,2,a</sup>, Vaishnavi Paithane<sup>1</sup>, Michael Place<sup>1</sup>, De Elegant Robinson<sup>2</sup>,  
6    James Hose<sup>3</sup>, Dana J. Wohlbach<sup>1,b</sup>, Audrey P. Gasch<sup>1,3</sup> #

7  
8    <sup>1</sup> Great Lakes Bioenergy Research Center, University of Wisconsin-Madison,  
9    Madison, Wisconsin, USA

10  
11   <sup>2</sup> Microbiology Training Program, University of Wisconsin-Madison, Madison,  
12   Wisconsin, USA

13  
14   <sup>3</sup> Laboratory of Genetics, University of Wisconsin-Madison, Madison, Wisconsin,  
15   USA

16  
17   <sup>a</sup> Current Address: Cargill, Minneapolis, MN

18  
19   <sup>b</sup> Current Address: Department of Biology, Dickinson College, Carlisle,  
20   Pennsylvania, USA

21  
22  
23   # Corresponding author:  
24   E-mail: [agasch@wisc.edu](mailto:agasch@wisc.edu) (APG)

25  
26  
27  
28

29

30

31

32

33

34

## 35 **Abstract**

36 Cellulosic plant biomass is a promising sustainable resource for  
37 generating alternative biofuels and biochemicals with microbial factories. But a  
38 remaining bottleneck is engineering microbes that are tolerant of toxins  
39 generated during biomass processing, because mechanisms of toxin defense are  
40 only beginning to emerge. Here, we exploited natural diversity in 165  
41 *Saccharomyces cerevisiae* strains isolated from diverse geographical and  
42 ecological niches, to identify mechanisms of hydrolysate-toxin tolerance. We  
43 performed genome-wide association (GWA) analysis to identify genetic variants  
44 underlying toxin tolerance, and gene knockouts and allele-swap experiments to  
45 validate the involvement of implicated genes. In the process of this work, we  
46 uncovered a surprising difference in genetic architecture depending on strain  
47 background: in all but one case, knockout of implicated genes had a significant  
48 effect on toxin tolerance in one strain, but no significant effect in another strain.  
49 In fact, whether or not the gene was involved in tolerance in each strain  
50 background had a bigger contribution to strain-specific variation than allelic  
51 differences. Our results suggest a major difference in the underlying network of  
52 causal genes in different strains, suggesting that mechanisms of hydrolysate  
53 tolerance are very dependent on the genetic background. These results could  
54 have significant implications for interpreting GWA results and raise important  
55 considerations for engineering strategies for industrial strain improvement.

56

57

## 58 **Author summary**

59 Understanding the genetic architecture of complex traits is important for  
60 elucidating the genotype-phenotype relationship. Many studies have sought  
61 genetic variants that underlie phenotypic variation across individuals, both to  
62 implicate causal variants and to inform on architecture. Here we used genome-  
63 wide association analysis to identify genes and processes involved in tolerance  
64 of toxins found in plant-biomass hydrolysate, an important substrate for  
65 sustainable biofuel production. We found substantial variation in whether or not  
66 individual genes were important for tolerance across genetic backgrounds.  
67 Whether or not a gene was important in a given strain background explained  
68 more variation than the allelic differences in the gene. These results suggest  
69 substantial variation in gene contributions, and perhaps underlying mechanisms,  
70 of toxin tolerance.

71  
72

## 73 **Introduction**

74 The increased interest in renewable energy has focused attention on non-  
75 food plant biomass for the production of biofuels and biochemicals [1].

76 Lignocellulosic plant material contains significant amounts of sugars that can be  
77 extracted through a variety of chemical pretreatments and used for microbial  
78 production of alcohols and other important molecules [2-5]. However, there are  
79 major challenges to making biofuel production from plant biomass economically  
80 viable [6]. One significant hurdle with regards to microbial fermentation is the  
81 presence of toxic compounds in the processed plant material, or hydrolysate,  
82 including weak acids, furans and phenolics released or generated by the  
83 pretreatment process [7-10]. The concentrations and composition of these  
84 inhibitors vary for different pretreatment methods and depend on the plant  
85 feedstocks [7, 9, 11]. These toxins decrease cell productivity by generating  
86 reactive oxygen species, damaging DNA, proteins, cell membranes [12-14], and  
87 inhibiting important physiological processes, including enzymes required for

88 fermentation [15], *de novo* nucleotide biosynthesis [16], and translation [17].  
89 Despite knowledge of these targets, much remains to be learned about how the  
90 complete suite of hydrolysate toxins (HTs) acts synergistically to inhibit cells.  
91 Furthermore, how the effects of HTs are compounded by other industrial stresses  
92 such as high osmolarity, thermal stress, and end-product toxicity remains murky.  
93       Engineering strains with improved tolerance to industrial stresses  
94 including those in the plant hydrolysate is of the utmost importance for making  
95 biofuels competitive with fuels already in the market [6]. A goal in industrial strain  
96 engineering is to improve lignocellulosic stress tolerance, often through directed  
97 engineering. Many approaches have been utilized to identify genes and  
98 processes correlated with increased stress tolerance, including transcriptomic  
99 profiling of cells responding to industrial stresses [18-21], genetic mapping in  
100 pairs of strains with divergent phenotypes [22-25], and directed evolution to  
101 compare strains selected for stress tolerance with starting strains [26-29].  
102 However, in many cases the genes identified from such studies do not have the  
103 intended effect when engineered into different genetic backgrounds [30-33]. One  
104 reason is that there are likely to be substantial epistatic interactions between the  
105 genes identified in one strain and the genetic background from which it was  
106 identified [34]. A better understanding of how tolerance mechanisms vary across  
107 genetic backgrounds is an important consideration in industrial engineering.  
108       Exploring variation in HT tolerance across strain background could also  
109 reveal additional defense mechanisms. The majority of functional studies in  
110 *Saccharomyces cerevisiae* are carried out in a small number of laboratory strains

111 that do not represent the rich diversity found in this species [35, 36]. The  
112 exploration of natural diversity in *S. cerevisiae* has revealed a wide range of  
113 genotypic and phenotypic variability within the species [36-40]. In some cases,  
114 trait variation is correlated with genetic lineage [36, 41-43], indicating a strong  
115 influence of population history. At least 6 defined lineages have been identified  
116 in the species, including strains from Malaysia, West Africa, North America,  
117 Europe/vineyards, and Asia [41] as well as recently identified populations from  
118 China [38, 44]. In addition to genetic variation, phenotypic variation has  
119 cataloged natural differences across strains, in transcript abundance [37, 45, 46],  
120 protein abundance [47-49], metabolism [50-52], and growth in various  
121 environments [32, 36, 37, 42, 52-54]. Thus, *S. cerevisiae* as a species presents  
122 a rich resource for dissecting how genetic variation contributes to phenotypic  
123 differences. In several cases this perspective has benefited industry in  
124 producing novel strains by combining genetic backgrounds or mapping the  
125 genetic basis for trait differences [25, 55-59].

126 We used genome-wide association (GWA) in *S. cerevisiae* strains  
127 responding to synthetic hydrolysate (SynH), both to identify new genes and  
128 processes important for HT tolerance and to explore the extent to which genetic  
129 background influences mechanism. We tested 20 genes associated with HT  
130 tolerance and swapped alleles across strains to validate several allele-specific  
131 effects. However, in the process of allele exchange we discovered striking  
132 differences in gene contributions to the phenotype: out of 14 gene knockouts  
133 tested in two strains with opposing phenotypes, 8 (57%) had a statistically

134 significant effect on HT tolerance in one of the backgrounds but little to no  
135 significant effect in the other background. In most of these cases, the specific  
136 allele had little observable contribution to the phenotype. Thus, although GWA  
137 successfully implicated new genes and processes involved in HT tolerance, the  
138 causal variation in the tested strains is not at the level of the allele but rather  
139 whether or not the gene's function is important for the phenotype in that  
140 background. This raises important implications for considering natural variation  
141 in functional networks to explain phenotypic variation.

142

## 143 **Results**

144

### 145 **Genetic variation across 165 *S. cerevisiae* strains**

146         We obtained 165 *Saccharomyces cerevisiae* strains, representing a  
147 range of geographical and ecological niches, that have high quality whole  
148 genome sequencing reads (coverage ~30X), coming from published sequencing  
149 projects across the yeast community [39, 42, 52, 60] (S1 Table). We identified  
150 486,302 high quality SNPs (see Methods). 68% of them had a minor allele  
151 frequency less than 5%. Nucleotide variation compared to the well-studied  
152 S288c-derived reference strain varied from as low as 0.08% for the closely  
153 related W303 lab strain and as high as 0.72% for the bakery strain YS4 (S1  
154 Table). The majority of strains were largely homozygous (in some cases due to  
155 strain manipulation by sequencing projects); however, we identified 21 strains  
156 with >20% heterozygous sites. Most of these were from natural environments  
157 (11 strains) but they also included clinical samples (5 strains), baking strains (3  
158 strains), a sugar cane fermenter (1) and a laboratory strain (FL100, which was

159 scored as 98% heterozygous and may have mated with another strain in its  
160 recent history (S1 Table)).

161         Sixty-three percent of the variants were present in coding regions (S2  
162 Table), which is lower than random expectation (since 75% of the yeast genome  
163 is coding) and consistent with purifying selection acting on most gene sequences.  
164 Indeed, coding variants predicted to have high impact, such as SNPs that  
165 introduce a stop codon, eliminate the start codon, or introduce a defect in the  
166 splicing region, were very rare (0.004% of genic SNPs) – a third of these were in  
167 dubious ORFs (22%) or genes of unknown function (8%) [61] that are likely  
168 nonfunctional and under relaxed constraint. However, 54 genes with debilitating  
169 polymorphisms are reportedly essential in the S288 background; nearly half of  
170 these polymorphisms are present in at least 3 strains and in some cases are  
171 lineage specific (S3 Table). Tolerance of these polymorphisms could arise  
172 through duplication of a functional gene copy [62], but could also arise due to  
173 evolved epistatic effects as has been previously reported [63], highlighting the  
174 complexity behind genetic networks and the role of genetic variation in  
175 determining their regulation.

176         Principle component analysis of the genomic data recapitulated the known  
177 lineages represented in the collection, including the European/wine, Asian/sake,  
178 North American (NA), Malaysian, West African (WA), and mosaic groups [36, 41,  
179 42, 64] (S1 Table). Our analysis split the West African population into three  
180 subgroups not previously defined (Fig 1A). Construction of a simple neighbor-

181 joining (NJ) tree broadly confirmed the population groups present in the 165-  
182 strain collection (Fig 1 B).

183  
184

185 **Phenotypic variation in SynH tolerance is partly correlated with ancestral**  
186 **group**

187 We scored variation in lignocellulosic hydrolysate tolerance in several  
188 ways. Strains that are sensitive to hydrolysate grow slower and consume less  
189 sugars over time [65], thus we measured final cell density and percent of glucose  
190 consumed after 24 hours to represent SynH tolerance. Growth and glucose  
191 consumption were significantly correlated ( $R^2 = 0.79$ ), although there was some  
192 disagreement for particular strains (including flocculant strains) (S1 Table). We  
193 also determined tolerance to HTs specifically, to distinguish stress inflicted by  
194 HTs from effects of the base medium that has unusual nutrient composition and  
195 high osmolarity due to sugar concentration. To do this, we calculated the relative  
196 percent-glucose consumed and final OD<sub>600</sub> in media with (SynH) and without HT  
197 toxins (SynH –HTs, see Methods) (S1 Table). Tolerance to SynH base medium  
198 without toxins (SynH –HT) and SynH with the toxins was only partly correlated  
199 ( $R^2 = 0.48$ ) (S1 Fig), suggesting that there are separable mechanisms of growing  
200 in base medium and surviving the toxins.

201 There is wide variation in tolerance to lignocellulosic hydrolysate that  
202 partly correlates with populations (Fig 2, S1 Fig). North American and Malaysian  
203 strains displayed the highest tolerance to SynH. As expected, phenotypic  
204 variation within each population was related to genetic variation, e.g. West



205 African strains in Population 5 showed low genetic and phenotypic variation while  
206 mosaic strains with genetic admixture showed the widest range of phenotypes.

207

208

209 **Genome-wide association analysis reveals genes associated with SynH**  
210 **tolerance**

211 We used GWA to map the genetic basis for the differences in SynH  
212 tolerance, for each of the four phenotypes introduced above. The population  
213 signatures in *S. cerevisiae* are problematic for GWA, since the strong  
214 correlations between phenotype and ancestry obscure the identification of causal  
215 polymorphisms [66, 67]. To overcome this, we incorporated a large number of  
216 mosaic strains in the analysis and used a mixed-linear model to account for  
217 strain relationships, as implemented in the program GAPIT [68] (see Methods).  
218 We used as input SNPs that were present in at least 3 strains, eliminating 42% of  
219 SNPs in the dataset (see Methods). Of the remaining SNPs, 45% have a minor  
220 allele frequency of less than 5%; only those with an allele frequency >2% were  
221 used for GWA. GWA identified loci whose variation correlated with phenotypic  
222 variation. None of the GWA-implicated loci passed the stringent Bonferroni p-  
223 value correction based on the number of effective tests (see Methods), which is  
224 not uncommon for GWA at this scale [42, 69, 70]. We therefore used a  
225 somewhat arbitrary p-value cutoff of 1e-04 and performed additional filtering to  
226 minimize false positive associations (see Methods).

227 The combined analysis yielded 76 SNPs that met our p-value threshold  
228 (S4 Table, S2 Fig). Thirty-eight of these SNPs, linked to 33 genes, passed

229 additional filtering (See Methods, Table 1). Of these, 17 SNPs are associated  
230 with growth in SynH, while 23 SNPs are associated with tolerance to HTs  
231 specifically (Table 1). Eight of the SNPs are intergenic and 20 are located within  
232 genes, with 13 of those predicted to change the coding sequence. Although we  
233 would expect that SNPs linked to HT tolerance should be identified in both sets  
234 of analyses, only 2 SNPs were significantly associated with both SynH and HT  
235 tolerance. This almost certainly highlights limited statistical power with the small  
236 set of strains used here. For most SNPs, the allele associated with tolerance  
237 was more frequent in our strain collection (Fig 3A), but for some it was the allele  
238 associated with sensitivity that was nearly fixed. We carried out additional GWA  
239 filtering to ensure that results were not driven by population structure (see  
240 Methods), since we note that many of sensitive alleles were prominent in the  
241 Asian population (S3 Fig). As expected for a largely additive trait, there was a  
242 significant linear correlation between the number of deleterious alleles a strain  
243 harbored and its tolerance to hydrolysate ( $R^2 = 0.48$ ,  $p = 2.2e-16$ , Fig 3B).

244 Interestingly, the genes associated with the 38 implicated SNPs capture  
245 functionally related processes, suggesting mechanistic underpinnings of  
246 hydrolysate tolerance. Lignocellulosic hydrolysate contains a large number of  
247 toxins that affect multiple cellular functions and can target energy stores,  
248 membrane fluidity, protein and DNA integrity, and other processes [10, 65]. Our  
249 analysis implicated several genes involved in redox reactions (*ADH4*, *ALD3*),  
250 protein folding or modification (*CYM1*, *UBP5*, *UFD2*, *AOS1*), ergosterol or fatty  
251 acid synthesis (*ERG12*, *HMG2*, *NSG2*), DNA metabolism and repair (*REV1*,

252 *DAT1, MCM5, SHE1*), mRNA transcription and export (*LEU3, SIR3, ELF1,*  
253 *RIM20, MEX67*), mitochondrial function (*MNE1, MAS1*), and flocculation (*FLO1,*  
254 *FLO10*). Several of these processes were already known to be associated with  
255 hydrolysate stress, including flocculation [71], ubiquitin-dependent processes that  
256 may be linked to protein folding challenges [13, 72, 73], and sterol biosynthesis  
257 which affects tolerance to multiple stresses present in this media [32, 74, 75].  
258 Nearly a third of these genes were identified as differentially expressed in our  
259 previous study comparing strain responses to SynH and rich medium [32],  
260 although this was not enriched above what is expected by chance. Thus,  
261 although gene expression differences can be informative in suggesting affected  
262 cellular processes, many of the genes implicated by GWA cannot be predicted by  
263 expression differences, especially SNPs that affect function without altering gene  
264 expression. Additional genes identified here belong to functional groups  
265 previously identified in our differential expression analysis, such as amino-acid  
266 and NAD biosynthesis.

267

### 268 **Gene knockouts confirm functional requirement for some implicated genes**

269 We sought to confirm the importance of the GWA-implicated genes in  
270 SynH tolerance, first through gene-knockout analysis and then with allelic  
271 replacement in two different strains backgrounds. We began by knocking out 19  
272 of the implicated genes in the tolerant North American strain, YPS128. Of these,  
273 37% (7/19) of the knockout mutants had a significant phenotype when grown on  
274 SynH: four displayed decreased SynH tolerance, while 3 showed increased

275 performance (Fig 4A). We note that 4 of the 7 knockouts had a mild phenotypic  
276 effect in standard growth medium (that was generally exacerbated in SynH),  
277 while 3 of these had a phenotype only in response to SynH (S4 Fig). The most  
278 significant knockouts decreasing tolerance in the YPS128 strain included the  
279 transcription factor *LEU3*, ribosomal protein *RPL21B*, protein phosphatase  
280 subunit *SAP190*, and to a milder extent the mitotic spindle protein *SHE1*. None  
281 of these genes has been directly implicated in tolerance to hydrolysate in  
282 previous studies.

283         The effect of deleting *LEU3*, which encodes the leucine-responsive  
284 transcription factor, was intriguing, since our prior work reported that amino-acid  
285 biosynthesis genes are induced specifically in response to HTs [32]. To confirm  
286 that this response was due to the toxicity found in the media and not due to  
287 amino acid shortage in SynH, we compared growth in synthetic complete (SC)  
288 medium, which has similar levels of branched-chain amino acids compared to  
289 SynH. The *LEU3* knockout strain grew as well as the wild type in SC, but it grew  
290 to 54% lower final density in SynH –HT medium and 79% lower density in SynH  
291 medium with the toxins added (Fig 5A). The defect was not fully complemented  
292 by supplementing synthetic hydrolysate with 10X the normal amino acid mix (Fig  
293 5B), indicating that amino acid shortage in the medium is unlikely to fully explain  
294 the growth defect.

295         The most striking phenotypic improvement was caused by deletion *MNE1*,  
296 encoding a splicing factor for the cytochrome c oxidase-encoding *COX1* mRNA  
297 [76]. Aerobically, the mutant grew to roughly similar cell densities but consumed

298 44.7% more glucose and generated 64% more ethanol than the wild type,  
299 generating significantly more ethanol per cell (S5 Fig). A logical hypothesis is  
300 that this mutant has a defect in respiration and thus relies more on glycolysis to  
301 generate ATP and ethanol than wild-type cells [76]. Under this hypothesis, the  
302 effect of the mutation should be normalized when cells are grown anaerobically  
303 because both the mutant and wild type must rely on fermentation. However,  
304 under anaerobic conditions the mutant grew significantly better than the wild type  
305 (Fig 6A), consumed 70% more glucose (Fig 6B), and produced 63% more  
306 ethanol after 24-hour growth (Fig 6C). Thus, a simple defect in respiration is  
307 unlikely to explain the result, suggesting that Mne1 may have a separable role  
308 relating anaerobic toxin tolerance and/or metabolism.

309

### 310 **Extensive background effects influence gene involvement in SynH**

#### 311 **tolerance**

312 We next knocked out 16 genes in the sensitive strain YJM1444, with the  
313 intention of allelic exchange (Fig 4B). We were unable to recover knockouts for  
314 some of the genes tested in YPS128, but of those we acquired 14 overlapped the  
315 YPS128 knockouts, and two (*REV2* and *HMG2*) that we were unable to knock  
316 out in the tolerant strain were added. Remarkably, knockouts had strikingly  
317 different effects between the two genetic backgrounds – while three of the gene  
318 deletions affected hydrolysate tolerance in YJM1444, there was no overlap with  
319 the gene deletions causing a statistically significant effect in YPS128 (although  
320 some mild effects may be below our statistical power to detect). The three

321 knockouts specific to YJM1444 improved SynH tolerance and included two  
322 genes involved in sterol biosynthesis (*NSG2* and *HMG2*) and one involved in  
323 flocculation (Fig 4B). In fact, deletion of *FLO1* dramatically reduced the  
324 flocculation phenotype of YJM1444 and resulted in >236% increased glucose  
325 consumption in SynH. This single mutation converted YJM1444 tolerance to the  
326 level of SynH tolerance seen in YPS128 (S6 Fig). To test that this phenotypic  
327 effect was directly caused by the *FLO1* allele, we deleted its paralog *FLO5*,  
328 which caused neither a change in flocculation nor increased glucose  
329 consumption of the culture (S7 Fig).

330       There appeared to be subtle, but not significant, effects of the *MNE1*  
331 deletion in YJM1444 and we wondered if the was obscured by flocculation.  
332 Therefore, we measured glucose consumption in high-rpm shake flasks that  
333 disrupt flocculation. Indeed, *MNE1* deletion had a significant benefit under these  
334 conditions; however, the magnitude of the effect was more subtle than *MNE1*  
335 deletion in YPS128 (S8A Fig). We also tested this deletion in an industrial strain,  
336 Ethanol Red (E. Red). Deletion of *MNE1* in a haploid spore derived from E. Red  
337 produced a minor, reproducible benefit although it was not statistically significant  
338 (S8A Fig). Nonetheless, these results show that *MNE1* plays a role in SynH  
339 tolerant, albeit to different levels, in three different strain backgrounds.

340

341 **Genetic background effects dominate the effect of allelic variation in HT**  
342 **tolerance**

343           We tested allelic effects in two ways. First, we introduced a plasmid-borne  
344 copy of the tolerant allele or sensitive allele (S5 Table) into YPS128 lacking the  
345 native gene, and measured percent final glucose consumption in SynH (S9 Fig)  
346 in synthetic complete medium (required to allow drug-based plasmid selection)  
347 with HTs (Fig 7A). The assay was fairly noisy, in part because wild-strains are  
348 somewhat intolerant to the plasmid drug marker (unpublished). Nonetheless,  
349 there was a clear effect for the *FLO1* allele, which caused YPS128 to become  
350 flocculant and dramatically decreased growth in the SC with HTs. We did not  
351 observe other allele-dependent effects that overcame the variability of the assay,  
352 including for the genes whose knockout produced a defect in YPS128. Second,  
353 we performed reciprocal hemizyosity analysis for six genes, including three  
354 genes that whose deletion produced differential effects in YPS128 and YJM144.  
355 We crossed the YPS128 and YJM1444 backgrounds such that the resulting  
356 diploid was hemizygous for either the tolerant or sensitive allele (Fig 7B). In this  
357 case, none of the six genes had an allele-specific effect – surprisingly, this  
358 included *FLO1* for which there was clear allelic impact in the haploid  
359 backgrounds. We realized a unique phenotype in the YPS128-YJM1444 hybrid:  
360 whereas the strain is heterozygous for the functional *FLO1* allele, the hybrid lost  
361 much of the flocculence of the YJM1444 strain (S8B Fig). *FLO1* expression is  
362 known to be repressed in some diploid strains [77]. Thus, simply mating the  
363 strains in effect created a new genetic background that changed the allelic  
364 impact of the gene.

365           We wondered if this effect explained the lack of allele-specific phenotypes  
366 for other implicated genes. We therefore created homozygous deletions in the  
367 diploid hybrid for six genes whose deletion had strain-specific impacts in the  
368 haploids (Fig 7C). Two of the knockouts (*leu3Δ* and *sap190Δ*) produced a defect  
369 in the hybrid, similar to the effect seen in YPS128. Homozygous deletion of  
370 *MNE1* produced a unique growth defect in 24-well plates that was not seen in the  
371 haploids or the hemizygous diploids. This appeared to be due to increased  
372 flocculation in the hybrid diploid; growth in shake flasks to disrupt flocculation  
373 resulted in a mild but statistically insignificant benefit to the hybrid when grown in  
374 flasks, similar to that seen for YJM1444. In contrast, deletion of *RIM20* or *FLO1*  
375 had no effect under these growth conditions – this explains the lack of allele  
376 specific effect, because the genes are no longer important in this background  
377 and under these growth conditions.

378           Mating YJM128 and YJM144 created a new background that surpassed  
379 performance of YPS128 (Fig 7D). We wondered if hybridization could benefit  
380 other strains as well. We mated industrial strain E. Red crossed to YJM1444 and  
381 YPS128. E. Red and YJM1444 were both scored as sensitive and perform  
382 similarly in SynH (Fig 7D). However, the hybrid had a striking jump in SynH  
383 tolerance, exceeding the tolerance of YPS128. This benefit may be in part  
384 because the new diploid background changes the flocculation phenotype. On  
385 the other hand, YJM144 and E. Red harbor alternate alleles at 71% of the SNPs  
386 implicated by GWA, raising the possibility that complementation of recessive  
387 alleles could also contribute to the strain improvement (see Discussion).



388

## 389 **Discussion**

390

391       Engineering strains for tolerance to lignocellulosic hydrolysate has proven  
392 difficult due to the complex stress responses required to deal with the  
393 combinatory effects of toxins, high osmolarity, and end products such as alcohols  
394 and other chemicals. Even when the cellular targets of stressors are known, the  
395 mechanisms for increasing tolerance are not always clear. We leveraged  
396 phenotypic and genetic variation to implicate new mechanisms of hydrolysate  
397 tolerance, by finding correlations between phenotypic and genetic differences  
398 among a collection of *Saccharomyces cerevisiae* strains, which allowed us to  
399 implicate specific genes and alleles involved in hydrolysate tolerance. The  
400 results indicate several important points relevant to engineering improved  
401 hydrolysate tolerance and genetic architecture of tolerance more broadly.

402       Perhaps the most striking result is the level to which gene involvement  
403 varies across the strains in our study. We expected that swapping alleles of  
404 implicated SNPs should contribute to variation in the phenotype. Most alleles did  
405 not detectably affect tolerance, although it is likely that they may have a minor  
406 contribution below our limit of detection. Indeed, strains that harbor more  
407 deleterious alleles are significantly more sensitive to SynH (Fig 3B), as expected  
408 for an additive trait. But at the same time, we uncovered significant variation in  
409 whether the underlying gene was involved in the phenotype. Among the genes  
410 that we were able to knockout in both strains (14 genes), 57% produced a  
411 phenotype (to varying levels and significance) in one of the two strains we tested.

412 This indicates substantial epistatic interactions with the genetic background, such  
413 that the gene is important in one strain and but dispensable in another. Even  
414 more striking is the case of *FLO1*: knocking out the functional gene in YJM1444  
415 produced a major benefit to that strain, whereas introducing the functional allele  
416 to YPS128 was very detrimental to SynH tolerance. Yet neither the allele nor the  
417 gene itself influenced SynH tolerance in the hybrid, because the hybrid is much  
418 less flocculant under these conditions (despite carrying functional YJM1444  
419 *FLO1* gene).

420 While it may not be surprising that gene knockouts result in quantitatively  
421 different phenotypes, we did not expect that most knockouts would have no  
422 detectable effect in specific backgrounds. It will be important to investigate the  
423 extent to which this effect is true in other organisms and for other phenotypes.  
424 However, evidence in the literature hints at the breadth of this result: several  
425 genes are required for viability in one yeast strain but not another [63, 78], while  
426 overexpression of other genes produces a phenotype in one background but not  
427 others [32]. Genetic background effects on gene contributions have been  
428 reported before, in yeast and other organisms [35, 79-84]; however, the extent to  
429 which different genes appear to be involved in toxin tolerance in the different  
430 strains studied here suggests an important consideration that is  
431 underappreciated in GWA analysis: that the network of genes contributing to the  
432 phenotype could be largely different depending on genomic context. Dissecting  
433 these epistatic interactions is likely to be daunting, since a major challenge in  
434 most GWA studies remains identifying the epistatic interactions due to the high

435 statistical hurdle [34, 85, 86]. We propose that emerging network-based  
436 approaches to augment linear contributions will be an important area in  
437 identifying genetic contributions in the context of background-specific effects.

438 QTL mapping has allowed the characterization of the genetic architecture  
439 of industrially relevant stresses, including tolerance to ethanol [22, 87], acetic  
440 acid [23, 56], and plant hydrolysate [25] among many others [24, 88-90]. But  
441 while this method exploits the genetic diversity between two strains, with GWA  
442 we were able to study a much larger collection of genetic diversity, providing  
443 unique insights. SynH tolerance is clearly a complex trait, with many genes likely  
444 contributing. Previous studies have shown that part of the growth inhibition can  
445 be explained by a re-routing of resources to convert toxins into less inhibitory  
446 compounds [18, 19, 91-94] and to repair damage generated by reactive oxygen  
447 species in membranes and proteins [13, 14, 95]. One of the most significant  
448 effects was caused by deletion of *LEU3*, the transcription factor regulating genes  
449 involved in branched amino acid biosynthesis. Interestingly, weak acids have  
450 been shown to inhibit uptake of aromatic amino acids causing growth arrest [96],  
451 and it is possible that Leu3 is required to combat this effect. Chemical genomic  
452 experiments suggest an additional role for Leu3 in managing oxidative stress in  
453 the cell [97], which could relate to oxidative stressors in hydrolysate [13, 14, 32].  
454 We also uncovered a gene, *Mne1*, that when deleted significantly increases  
455 ethanol production in SynH. *Mne1* aids the splicing of *COX1* mRNA [76] and has  
456 not been previously linked to stress tolerance. Interestingly, *MNE1* mutants  
457 produced more ethanol per cell aerobically, but also grew substantially better in

458 SynH anaerobically, raising the possibility that Mne1 plays an additional,  
459 unknown role in cellular physiology that can be utilized to increase fermentation  
460 yields. Finally, although flocculation has been previously shown to increase cell  
461 survival in hydrolysate [71], our study showed that flocculation reduced the rate  
462 of sugar consumption in the culture, likely because cells in the middle of the  
463 clump are nutrient restricted. Together, these results shed new light on SynH  
464 tolerance and mechanisms for future engineering.

465 Our results raise broader implications for strain engineering, based on the  
466 genetic architectures uncovered here. Given the implication of gene-by-  
467 background interactions, the best route for improving strain performance may be  
468 crossing strains for hybrid vigor [98-100]. Indeed, we unexpectedly generated a  
469 strain that outperformed the tolerant YPS128, by crossing two poor performers in  
470 SynH. This improved vigor could emerge if the hybrid complements recessive  
471 deleterious alleles in each strain, or if mating creates a new genetic background  
472 that changes the requirements (and fitness) of the strain. We believe that both  
473 models – weak but additive allelic contributions in the context of epistatic  
474 background effects – are at work in our study. For additive traits, GWA and  
475 genomic studies can have significant practical power, by predicting where  
476 individual strains fall on the genotype-phenotype spectrum and by suggesting  
477 which strains should be crossed for maximal phenotypic effect.

478

## 479 **Methods**

480

### 481 **Strains**

482           Strains used in the GWA are listed in S1 Table Gene knockouts were  
483 performed in strains derived from North American strain YPS128 and mosaic  
484 strain YJM1444. The homozygous diploid parental strains were first engineered  
485 into stable haploids by knocking out the homothallic switching endonuclease  
486 (HO) locus with the *KAN-MX* antibiotic marker [101], followed by sporulation in  
487 1% potassium acetate plates and dissection of tetrads to attain heterothallic  
488 MAT $\alpha$  and MAT $\alpha$  derivatives. Gene knockouts were generated through  
489 homologous recombination with the HERP1.1 drug resistance cassette [102] and  
490 verified by 3 or 4 diagnostic PCRs (validating that the cassette was integrated  
491 into the correct locus and that no PCR product was generated from within the  
492 gene that was deleted). Most knockouts removed the gene from ATG to stop  
493 codon, but in some cases (e.g. *kdx1*) additional flanking sequence was removed,  
494 without removing neighboring genes. Genes from YPS128 or strains carrying the  
495 sensitive allele (S5 Table) were cloned by homologous recombination onto a  
496 CEN plasmid, taking approximately 1,000 bps upstream and 600 bps  
497 downstream from each genome, and verified by diagnostic PCR. Phenotyping of  
498 strains harboring alternate alleles on plasmids was performed in as previously  
499 described, except that the pre-culture was grown in YPD with 100 mg/L  
500 nourseothricin (Werner BioAgents, Germany) to maintain the plasmid expressing  
501 each allele. We note that plasmid-bourn expression of the gene complemented  
502 the gene-deletion phenotype, where applicable, in all cases tested (not shown).  
503 Allele specific effects were additionally tested by reciprocal hemizyosity analysis  
504 (RHA) [103]. The HO locus was replaced with the nourseothricin resistance

505 cassette (*NAT-MX*) for each mating type of YPS128 and YJM1444. These were  
506 then crossed with the appropriate deletion strain of opposite mating type and  
507 harboring the KanMX cassette, selecting for mated cells resistant to both drugs,  
508 to generate heterozygous strains that were hemizygous for the gene in question  
509 (crosses shown in S6 Table).

510

### 511 **Media, growth, and phenotyping conditions**

512 Synthetic Hydrolysate (SynH) medium mimics the lignocellulosic  
513 hydrolysate generated from AFEX ammonium treated corn stover with 90 g  
514 glucan/L loading and was prepared as in Sardi *et al.* (2016). Two versions were  
515 prepared to represent the complete hydrolysate (SynH) and the hydrolysate  
516 without the hydrolysate toxin cocktail (HT) (SynH - HT), as previously published  
517 [32].

518 Phenotyping for GWA, gene deletion assessment, and RHA, was  
519 performed using high throughput growth assays in 24 well plates (TPP® tissue  
520 culture plates, Sigma-Aldrich, St. Louis, MO). To prepare the cultures, 10 µl of  
521 thawed frozen cell stock were pinned onto YPD agar plates (1% yeast extract,  
522 2% peptone, 2% dextrose, 2% agar) and grown for 3 days at 30°C. Cells were  
523 then pre-cultured in 24 well plates containing 1.5 ml of YPD liquid, sealed with  
524 breathable tape (AeraSeal, Sigma-Aldrich, St. Louis, MO), covered with a lid and  
525 incubated at 30°C while shaking for 24 h. Next, 10 µl of saturated culture was  
526 transferred to a 24 well plate containing 1.5 ml of SynH or SynH-HT where  
527 indicated, and grown as the preculture for 24 h. Cell density was measured by

528 optical density at 600 nm ( $OD_{600}$ ) as ‘final OD’. Culture medium collected after  
529 cells were removed by centrifugation was used to determine glucose  
530 concentrations by YSI 2700 Select high performance liquid chromatography  
531 (HPLC) and refractive index detection (RID) (YSI Incorporated, Yellow Springs,  
532 OH). Biological replicates were performed on different days.

533 For GWA, we used four different but related phenotype measures of cells  
534 growing in SynH or SynH – HTs: 1) final  $OD_{600}$  as a measure of growth, 2)  
535 percent of starting glucose consumed after 24 hours in SynH, 3) HT tolerance  
536 based on  $OD_{600}$  (calculated as the ratio of final  $OD_{600}$  in SynH versus final  $OD_{600}$   
537 in SynH -HTs), and 4) HT tolerance based on glucose consumption (calculated  
538 as the ratio of glucose consumed in SynH versus in SynH -HTs). Strains and  
539 phenotype scores are listed in S1 Table. Initial phenotyping for GWA was  
540 performed in biological duplicates; knockout strains and hemizygous strains were  
541 phenotyped in five biological replicates to increase statistical power, whereas  
542 homozygous deletion strains were phenotyped in triplicate. Replicates for each  
543 batch of strains shown in each figure were performed on separate days, for  
544 paired statistical analysis.

545 Experiments done for allele replacements expressed on plasmids were  
546 performed in glass tubes using modified synthetic complete medium (SC) with  
547 high sugar concentrations and the toxin cocktail where indicated (Sardi *et al*  
548 2016) to mimic SynH but with no ammonium to support nourseothricin selection  
549 [104] (1.7 g/L YNB w/o ammonia sulfate and amino acids, 1 g/L monosodium  
550 glutamic acid, 2 g/L amino acid drop-out lacking leucine, 48  $\mu$ g/L leucine, 90 g/L

551 dextrose, 45 g/L xylose). This was required since nourseothricin selection does  
552 not work in high-ammonium containing SynH. First, we precultured strains  
553 carrying plasmids in SC medium with nourseothricin (200 ug/ml) for 24 h. Next,  
554 we inoculated a fresh culture at a starting OD<sub>600</sub> of 0.1 in 7 ml of the modified  
555 synthetic complete medium with nourseothricin (200 ug/ml) and HTs. Cultures  
556 were grown for 24 h and phenotyped as described above. Replicates were  
557 performed on different days, and thus samples were paired by replicate date for  
558 t-test analysis.

559       Anaerobic phenotyping was performed in the anaerobic chamber, where  
560 cells were grown in flasks containing 25 ml SynH or SynH-HT and maintained in  
561 suspension using a magnetic stir bar. Ethanol production was measured over  
562 time by HPLC RID analysis. Paired t-test analysis was performed to determine  
563 significance, pairing samples by replicate date.

564

## 565 **Genomic sequencing and Analysis**

566       We obtained publicly available whole genome sequencing reads from  
567 *Saccharomyces cerevisiae* sequencing projects [39, 42, 52, 60]. Sequencing  
568 reads were mapped to reference genome S288C (NC\_001133, version 64 [105])  
569 using bwa-mem [106] with default settings. Single nucleotide polymorphisms  
570 (SNPs) were identified using GATK [107] Unified Genotyper, analyzing all the  
571 strains together to increase detection power. GATK pipeline included base  
572 quality score calibration, indel realignment, duplicate removal, and depth  
573 coverage analysis. Default parameters were used except for -mbq 25 to reduce



574 false positives. Variants were filtered using GATK suggested criteria:  $QD < 2$ , FS  
575  $> 60$ ,  $MQ < 40$ . A dataset with high quality SNPs was generated using VCFtools  
576 [108] by applying additional filters of a quality value above 2000 and excluding  
577 sites with more than 80% missing data. Genetic variant annotation was  
578 performed using SNPEff [109]. Principal component analysis and the neighbor-  
579 joining tree were performed with the R package Adegenet 1.3-1 [110] using the  
580 entire collection of high quality SNPs (486,302 SNPs).

581

## 582 **Genome-wide association analysis**

583 Correlations between genotype and phenotype were performed using a  
584 mixed linear model implemented in the software GAPIT [68]. Only SNPs with a  
585 minor allele frequency (MAF) of at least 2% were used for this analysis (282,150  
586 SNPs). Multiple models, each incorporating a different number of principal  
587 components to capture population structure (from 0 - 3), were analyzed. The  
588 final model was manually chosen as the one with the greatest overall agreement  
589 between the distribution of expected and the observed p-values, *i.e.* based on  
590 QQ plots with the least skew across the majority of SNPs. We performed four  
591 analyses, one for each for the four related phenotypes measured. The model  
592 used to map SynH final  $OD_{600}$  and SynH percent glucose consumed used 0  
593 principal components, with population structure corrected using only the kinship  
594 generated by GAPIT. The model used to map HT tolerance based on relative  
595 final  $OD_{600}$  used 2 principal components, and the model to map HT tolerance  
596 based on glucose consumed incorporated 1 principal component. The threshold

597 for significance accounting for multiple-test correction was identified by dividing  
598 the critical p-value cutoff of 0.05 by the number of independent tests estimated  
599 by the SimpleM method [111], which decreased the number of tests from  
600 282,150 to 137,398 to produce a p-value threshold of  $3.6e-7$  [112]. However,  
601 none of our tests passed this threshold, which is likely overly conservative. We  
602 therefore used a p-value threshold of  $1e-04$  to identify genes for detailed follow-  
603 up analysis. We realized that the extreme phenotypes of Asian/sake strains  
604 coupled with their strong population structure might be confounding the analysis  
605 (unpublished). Therefore, to further reduce the chance of false positives due to  
606 residual population influences, we reran the analyses without the 11 sake strains  
607 and removed from the original list of significant SNPs those with  $p > 5e-3$ . For  
608 each locus carrying a significant SNP, we plotted phenotypic distributions for  
609 each possible genotype. We focused subsequent downstream analysis on  
610 individual SNPs whose effects were additive across strains that were  
611 heterozygous and homozygous at that site, assessed visually. Genes affected  
612 by each SNP were determined by the SNPEff annotation, which predicted the  
613 effect of variants on genes.

614

615 **Table 1. SNPs associated with SynH tolerance.**

| Phen. | Locus<br>Chr: Pos | Type        | Gene/Region | Function             | p Value  |
|-------|-------------------|-------------|-------------|----------------------|----------|
| 4     | 12:1033361        | syn         | HMG2        | HMG coA reductase    | 3.20E-06 |
| 4     | 11:649062         | mis         | FLO10       | flocculation protein | 9.30E-06 |
| 1 & 2 | 16:230703         | mis         | MEX67       | mRNA export          | 1.10E-05 |
| 3     | 16:897004         | splice site | AOS1        | SUMO E1              | 1.30E-05 |
| 1     | 04:122163         | int         | UFD2 /      | Ubiquitin assembly   | 1.40E-05 |

|       |            |        |         |                              |          |
|-------|------------|--------|---------|------------------------------|----------|
| 1     | 04:122163  | int    | RBS1    | RNA Pol II assembly          | 1.40E-05 |
| 4     | 12:1034877 | mis    | HMG2    | HMG coA reductase            | 1.50E-05 |
| 3     | 15:993416  | syn    | MNE1    | mitochondrial matrix p.      | 1.70E-05 |
| 3     | 15:993550  | syn    | MNE1    | mitochondrial matrix p.      | 1.70E-05 |
| 3     | 15:993749  | syn    | MNE1    | mitochondrial matrix p.      | 1.70E-05 |
| 3     | 15:993770  | syn    | MNE1    | mitochondrial matrix p.      | 1.70E-05 |
| 4     | 15:983849  | syn    | REV1*   | DNA damage repair            | 2.60E-05 |
| 1     | 11:152140  | int    | KDX1* / | MAP kinase                   | 3.20E-05 |
| 1     | 11:152140  | int    | ELF1    | transcription elongation     | 3.20E-05 |
| 3     | 15:840176  | syn    | RIM20   | transcription reglugator     | 3.60E-05 |
| 2     | 13:685585  | syn    | ERG12   | ergosterol synthesis         | 3.60E-05 |
| 3     | 12:492470  | mis    | MAS1    | mitochondrial protein import | 4.40E-05 |
| 1 & 4 | 12:1037554 | mis    | LEU3    | transcription factor         | 4.60E-05 |
| 4     | 02:161990  | mis    | SHE1    | spindle protein              | 4.80E-05 |
| 4     | 15:984317  | syn    | REV1*   | DNA damage repair            | 4.90E-05 |
| 2 & 4 | 07:20180   | int    | ADH4* / | alcohol dehydrogenase        | 5.20E-05 |
| 2 & 4 | 07:20180   | int    | ZRT1    | zinc transport               | 5.20E-05 |
| 3     | 16:897179  | int    | AOS1 /  | SUMO E1                      | 5.30E-05 |
| 3     | 16:897179  | int    | SEC1    | secretion                    | 5.30E-05 |
| 1 & 2 | 09:333735  | syn    | TIR3*   | cell wall protein            | 6.20E-05 |
| 4     | 14:341663  | syn    | NSG2    | sterol biosynthesis          | 6.30E-05 |
| 3     | 01:203973  | mis    | FLO1*   | floccolation protein         | 6.70E-05 |
| 1 & 2 | 12:691485  | int    | PIG1* / | regulates Glc7 phosphatase   | 7.00E-05 |
| 1 & 2 | 12:691485  | int    | MCM5    | DNA replication              | 7.00E-05 |
| 3     | 13:599730  | syn    | ALD3*   | aldehyde dehydrogenase       | 7.80E-05 |
| 2     | 16:406798  | intron | RPL21B* | ribosomal protein            | 8.40E-05 |
| 4     | 13:44254   | syn    | DAT1*   | DNA binding protein          | 8.50E-05 |
| 1     | 11:496123  | syn    | SAP190  | phosphatase complex          | 8.70E-05 |
| 1     | 11:496158  | syn    | SAP190  | phosphatase complex          | 8.70E-05 |
| 2     | 12:1020142 | mis    | SIR3    | gene silencing               | 8.70E-05 |
| 2     | 12:1020245 | mis    | SIR3    | gene silencing               | 8.70E-05 |
| 2     | 04:1327584 | mis    | CYM1    | metalloproteaase             | 8.90E-05 |
| 2     | 06:244932  | mis    | BNA6    | NAD biosynthesis             | 8.90E-05 |
| 1     | 05:459953  | mis    | UBP5*   | ubiquitin-dep. protease      | 9.20E-05 |
| 3     | 13:599732  | mis    | ALD3*   | aldose reductase             | 9.40E-05 |
| 3     | 15:840149  | syn    | RIM20   | transcription reglugator     | 9.60E-05 |
| 2     | 05:24902   | int    | HXT13 / | hexose transporter           | 9.60E-05 |

|   |           |     |         |                   |          |
|---|-----------|-----|---------|-------------------|----------|
| 2 | 05:24902  | int | YEL068C | uncharacterized   | 9.60E-05 |
| 4 | 15:983117 | syn | REV1*   | DNA damage repair | 9.90E-05 |

616

617 SNPs whose p-value passed our threshold and additional filtering in any of the  
618 GWA are shown, ranked by significance. Phenotypes to which the SNP was  
619 associated are listed in the first column; (1) Final OD<sub>600</sub> in SynH, (2) Percent of  
620 glucose consumed in SynH, (3) HT tolerance based on OD<sub>600</sub>, (4) HT tolerance  
621 based on glucose consumed. SNPs identified in multiple GWA, the most  
622 significant p-value is listed in the last column. SNP type was determined by  
623 SNPeff: syn, synonymous; mis, missense; int, intergenic. Genes with asterisk  
624 (\*) were identified as differentially expressed in SynH in Sardi et al (2016).  
625

626

## 627 **Acknowledgments**

628

629 We thank Y. Zhang for generating SynH medium and T. Sato for helpful

630 comments on this work. This work was supported by the Department of Energy

631 Great Lakes Bioenergy Research Center (DOE Office of Science BER DE-FC02-

632 07ER64494). MS was supported by a National Science Foundation Graduate

633 Research Fellowship (DGE-1256259).

634

635

## 636 **References**

637

638 1. Fairley P. Introduction: Next generation biofuels. *Nature*.

639 2011;474(7352):S2-5. doi: 10.1038/474S02a. PubMed PMID: 21697838.

640 2. Perez J, Munoz-Dorado J, de la Rubia T, Martinez J. Biodegradation and

641 biological treatments of cellulose, hemicellulose and lignin: an overview. *Int*

642 *Microbiol.* 2002;5(2):53-63. doi: 10.1007/s10123-002-0062-3. PubMed PMID:

643 12180781.

644 3. Balan V, Bals B, Chundawat SP, Marshall D, Dale BE. Lignocellulosic biomass

645 pretreatment using AFEX. *Methods Mol Biol.* 2009;581. doi: 10.1007/978-1-60761-  
646 214-8\_5.

647 4. Hendriks AT, Zeeman G. Pretreatments to enhance the digestibility of

648 lignocellulosic biomass. *Bioresour Technol.* 2009;100(1):10-8. doi:

649 10.1016/j.biortech.2008.05.027. PubMed PMID: 18599291.

650 5. Chundawat SP, Beckham GT, Himmel ME, Dale BE. Deconstruction of

651 lignocellulosic biomass to fuels and chemicals. *Annu Rev Chem Biomol Eng.*

- 652 2011;2:121-45. doi: 10.1146/annurev-chembioeng-061010-114205. PubMed PMID:  
653 22432613.
- 654 6. Stephanopoulos G. Challenges in engineering microbes for biofuels  
655 production. *Science*. 2007;315(5813):801-4. doi: 10.1126/science.1139612.  
656 PubMed PMID: 17289987.
- 657 7. Klinke HB, Thomsen AB, Ahring BK. Inhibition of ethanol-producing yeast  
658 and bacteria by degradation products produced during pre-treatment of biomass.  
659 *Appl Microbiol Biotechnol*. 2004;66(1):10-26. doi: 10.1007/s00253-004-1642-2.  
660 PubMed PMID: 15300416.
- 661 8. Larsson S, Quintana-Sainz A, Reimann A, Nilvebrant NO, Jonsson LJ. Influence  
662 of lignocellulose-derived aromatic compounds on oxygen-limited growth and  
663 ethanolic fermentation by *Saccharomyces cerevisiae*. *Appl Biochem Biotechnol*.  
664 2000;84-86:617-32. PubMed PMID: 10849822.
- 665 9. Almeida JRM, Modig T, Petersson A, Hähn-Hägerdal B, Lidén G, Gorwa-  
666 Grauslund MF. Increased tolerance and conversion of inhibitors in lignocellulosic  
667 hydrolysates by *Saccharomyces cerevisiae*. *Journal of Chemical Technology &*  
668 *Biotechnology*. 2007;82(4):340-9. doi: 10.1002/jctb.1676.
- 669 10. Piotrowski JS, Zhang YP, Sato T, Ong I, Keating D, Bates D. Death by a  
670 thousand cuts: the challenges and diverse landscape of lignocellulosic hydrolysate  
671 inhibitors. *Front Microbiol*. 2014;5. doi: 10.3389/fmicb.2014.00090.
- 672 11. Chundawat SP, Vismeh R, Sharma LN, Humpala JF, da Costa Sousa L,  
673 Chambliss CK. Multifaceted characterization of cell wall decomposition products  
674 formed during ammonia fiber expansion (AFEX) and dilute acid based  
675 pretreatments. *Bioresour Technol*. 2010;101. doi: 10.1016/j.biortech.2010.06.027.
- 676 12. Krebs HA, Wiggins D, Stubbs M, Sols A, Bedoya F. Studies on the mechanism  
677 of the antifungal action of benzoate. *Biochemical Journal*. 1983;214(3):657-63.  
678 PubMed PMID: PMC1152300.
- 679 13. Nguyen TT, Iwaki A, Ohya Y, Izawa S. Vanillin causes the activation of Yap1  
680 and mitochondrial fragmentation in *Saccharomyces cerevisiae*. *J Biosci Bioeng*.  
681 2014;117(1):33-8. doi: 10.1016/j.jbiosc.2013.06.008. PubMed PMID: 23850265.
- 682 14. Allen SA, Clark W, McCaffery JM, Cai Z, Lanctot A, Slininger PJ, et al. Furfural  
683 induces reactive oxygen species accumulation and cellular damage in  
684 *Saccharomyces cerevisiae*. *Biotechnol Biofuels*. 2010;3:2. doi: 10.1186/1754-6834-  
685 3-2. PubMed PMID: 20150993; PubMed Central PMCID: PMCPMC2820483.
- 686 15. Modig T, Lidén G, Taherzadeh MJ. Inhibition effects of furfural on alcohol  
687 dehydrogenase, aldehyde dehydrogenase and pyruvate dehydrogenase. *Biochem J*.  
688 2002;363(Pt 3):769-76. PubMed PMID: 11964178; PubMed Central PMCID:  
689 PMCPMC1222530.
- 690 16. Pisithkul T, Jacobson TB, O'Brien TJ, Stevenson DM, Amador-Noguez D.  
691 Phenolic Amides Are Potent Inhibitors of De Novo Nucleotide Biosynthesis. *Appl*  
692 *Environ Microbiol*. 2015;81(17):5761-72. doi: 10.1128/AEM.01324-15. PubMed  
693 PMID: 26070680; PubMed Central PMCID: PMCPMC4551265.
- 694 17. Iwaki A, Ohnuki S, Suga Y, Izawa S, Ohya Y. Vanillin inhibits translation and  
695 induces messenger ribonucleoprotein (mRNP) granule formation in *saccharomyces*  
696 *cerevisiae*: application and validation of high-content, image-based profiling. *PLoS*

- 697 One. 2013;8(4):e61748. doi: 10.1371/journal.pone.0061748. PubMed PMID:  
698 23637899; PubMed Central PMCID: PMC3634847.
- 699 18. Petersson A, Almeida JR, Modig T, Karhumaa K, Hahn-Hagerdal B, Gorwa-  
700 Grauslund MF, et al. A 5-hydroxymethyl furfural reducing enzyme encoded by the  
701 *Saccharomyces cerevisiae* ADH6 gene conveys HMF tolerance. *Yeast* (Chichester,  
702 England). 2006;23(6):455-64. doi: 10.1002/yea.1370. PubMed PMID: 16652391.
- 703 19. Liu ZL, Moon J, Andersh BJ, Slininger PJ, Weber S. Multiple gene-mediated  
704 NAD(P)H-dependent aldehyde reduction is a mechanism of in situ detoxification of  
705 furfural and 5-hydroxymethylfurfural by *Saccharomyces cerevisiae*. *Appl Microbiol*  
706 *Biotechnol*. 2008;81(4):743-53. doi: 10.1007/s00253-008-1702-0. PubMed PMID:  
707 18810428.
- 708 20. Teixeira MC, Raposo LR, Mira NP, Lourenco AB, Sa-Correia I. Genome-wide  
709 identification of *Saccharomyces cerevisiae* genes required for maximal tolerance to  
710 ethanol. *Appl Environ Microbiol*. 2009;75. doi: 10.1128/aem.00845-09.
- 711 21. Mira NP, Palma M, Guerreiro JF, Sa-Correia I. Genome-wide identification of  
712 *Saccharomyces cerevisiae* genes required for tolerance to acetic acid. *Microb Cell*  
713 *Fact*. 2010;9:79. doi: 10.1186/1475-2859-9-79. PubMed PMID: 20973990; PubMed  
714 Central PMCID: PMC32972246.
- 715 22. Swinnen S, Schaerlaekens K, Pais T, Claesen J, Hubmann G, Yang Y, et al.  
716 Identification of novel causative genes determining the complex trait of high ethanol  
717 tolerance in yeast using pooled-segregant whole-genome sequence analysis.  
718 *Genome Res*. 2012;22(5):975-84. doi: 10.1101/gr.131698.111. PubMed PMID:  
719 22399573; PubMed Central PMCID: PMC3337442.
- 720 23. Geng P, Xiao Y, Hu Y, Sun H, Xue W, Zhang L, et al. Genetic dissection of acetic  
721 acid tolerance in *Saccharomyces cerevisiae*. *World J Microbiol Biotechnol*.  
722 2016;32(9):145. doi: 10.1007/s11274-016-2101-9. PubMed PMID: 27430512.
- 723 24. Hubmann G, Mathe L, Foulquie-Moreno MR, Duitama J, Nevoigt E, Thevelein  
724 JM. Identification of multiple interacting alleles conferring low glycerol and high  
725 ethanol yield in *Saccharomyces cerevisiae* ethanolic fermentation. *Biotechnol*  
726 *Biofuels*. 2013;6(1):87. doi: 10.1186/1754-6834-6-87. PubMed PMID: 23759206;  
727 PubMed Central PMCID: PMC3687583.
- 728 25. Maurer MJ, Sutardja L, Pinel D, Bauer S, Muehlbauer AL, Ames TD, et al.  
729 Quantitative Trait Loci (QTL)-Guided Metabolic Engineering of a Complex Trait. *ACS*  
730 *Synth Biol*. 2016. doi: 10.1021/acssynbio.6b00264. PubMed PMID: 27936603.
- 731 26. Chen Y, Sheng J, Jiang T, Stevens J, Feng X, Wei N. Transcriptional profiling  
732 reveals molecular basis and novel genetic targets for improved resistance to  
733 multiple fermentation inhibitors in *Saccharomyces cerevisiae*. *Biotechnol Biofuels*.  
734 2016;9:9. doi: 10.1186/s13068-015-0418-5. PubMed PMID: 26766964; PubMed  
735 Central PMCID: PMC4710983.
- 736 27. Heer D, Sauer U. Identification of furfural as a key toxin in lignocellulosic  
737 hydrolysates and evolution of a tolerant yeast strain. *Microbial biotechnology*.  
738 2008;1(6):497-506. doi: 10.1111/j.1751-7915.2008.00050.x. PubMed PMID:  
739 PMC3815291.
- 740 28. Hawkins GM, Doran-Peterson J. A strain of *Saccharomyces cerevisiae* evolved  
741 for fermentation of lignocellulosic biomass displays improved growth and  
742 fermentative ability in high solids concentrations and in the presence of inhibitory

- 743 compounds. *Biotechnol Biofuels*. 2011;4(1):49. doi: 10.1186/1754-6834-4-49.  
744 PubMed PMID: 22074982; PubMed Central PMCID: PMC3256112.
- 745 29. Ding M-Z, Wang X, Yang Y, Yuan Y-J. Comparative metabolic profiling of  
746 parental and inhibitors-tolerant yeasts during lignocellulosic ethanol fermentation.  
747 *Metabolomics*. 2012;8(2):232-43. doi: 10.1007/s11306-011-0303-6.
- 748 30. Ehrenreich IM, Torabi N, Jia Y, Kent J, Martis S, Shapiro JA, et al. Dissection of  
749 genetically complex traits with extremely large pools of yeast segregants. *Nature*.  
750 2010;464(7291):1039-42. doi: 10.1038/nature08923. PubMed PMID: 20393561;  
751 PubMed Central PMCID: PMC2862354.
- 752 31. Dimitrov LN, Brem RB, Kruglyak L, Gottschling DE. Polymorphisms in  
753 multiple genes contribute to the spontaneous mitochondrial genome instability of  
754 *Saccharomyces cerevisiae* S288C strains. *Genetics*. 2009;183(1):365-83. doi:  
755 10.1534/genetics.109.104497. PubMed PMID: 19581448; PubMed Central PMCID:  
756 PMC2746160.
- 757 32. Sardi M, Rovinskiy N, Zhang Y, Gasch AP. Leveraging Genetic-Background  
758 Effects in *Saccharomyces cerevisiae* To Improve Lignocellulosic Hydrolysate  
759 Tolerance. *Appl Environ Microbiol*. 2016;82(19):5838-49. doi:  
760 10.1128/AEM.01603-16. PubMed PMID: 27451446; PubMed Central PMCID:  
761 PMC5038035.
- 762 33. Cubillos FA, Billi E, Zorgo E, Parts L, Fargier P, Omholt S, et al. Assessing the  
763 complex architecture of polygenic traits in diverged yeast populations. *Mol Ecol*.  
764 2011;20(7):1401-13. doi: 10.1111/j.1365-294X.2011.05005.x. PubMed PMID:  
765 21261765.
- 766 34. Carlborg O, Haley CS. Epistasis: too often neglected in complex trait studies?  
767 *Nat Rev Genet*. 2004;5(8):618-25. doi: 10.1038/nrg1407. PubMed PMID: 15266344.
- 768 35. Gasch AP, Payseur BA, Pool JE. The Power of Natural Variation for Model  
769 Organism Biology. *Trends Genet*. 2016;32(3):147-54. doi: 10.1016/j.tig.2015.12.003.  
770 PubMed PMID: 26777596; PubMed Central PMCID: PMC4769656.
- 771 36. Warringer J, Zorgo E, Cubillos FA, Zia A, Gjuvsland A, Simpson JT, et al. Trait  
772 variation in yeast is defined by population history. *PLoS Genet*. 2011;7(6):e1002111.  
773 doi: 10.1371/journal.pgen.1002111. PubMed PMID: 21698134; PubMed Central  
774 PMCID: PMC3116910.
- 775 37. Kvitek DJ, Will JL, Gasch AP. Variations in stress sensitivity and genomic  
776 expression in diverse *S. cerevisiae* isolates. *PLoS Genet*. 2008;4(10):e1000223. doi:  
777 10.1371/journal.pgen.1000223. PubMed PMID: 18927628; PubMed Central PMCID:  
778 PMC2562515.
- 779 38. Wang QM, Liu WQ, Liti G, Wang SA, Bai FY. Surprisingly diverged populations  
780 of *Saccharomyces cerevisiae* in natural environments remote from human activity.  
781 *Mol Ecol*. 2012;21(22):5404-17. doi: 10.1111/j.1365-294X.2012.05732.x. PubMed  
782 PMID: 22913817.
- 783 39. Bergstrom A, Simpson JT, Salinas F, Barre B, Parts L, Zia A, et al. A high-  
784 definition view of functional genetic variation from natural yeast genomes. *Mol Biol*  
785 *Evol*. 2014;31(4):872-88. doi: 10.1093/molbev/msu037. PubMed PMID: 24425782;  
786 PubMed Central PMCID: PMC3969562.
- 787 40. Gerke JP, Chen CT, Cohen BA. Natural isolates of *Saccharomyces cerevisiae*  
788 display complex genetic variation in sporulation efficiency. *Genetics*.

- 789 2006;174(2):985-97. doi: 10.1534/genetics.106.058453. PubMed PMID: 16951083;  
790 PubMed Central PMCID: PMCPMC1602093.
- 791 41. Liti G, Carter DM, Moses AM, Warringer J, Parts L, James SA, et al. Population  
792 genomics of domestic and wild yeasts. *Nature*. 2009;458(7236):337-41. doi:  
793 10.1038/nature07743. PubMed PMID: 19212322; PubMed Central PMCID:  
794 PMCPMC2659681.
- 795 42. Strobe PK, Skelly DA, Kozmin SG, Mahadevan G, Stone EA, Magwene PM, et al.  
796 The 100-genomes strains, an *S. cerevisiae* resource that illuminates its natural  
797 phenotypic and genotypic variation and emergence as an opportunistic pathogen.  
798 *Genome Res*. 2015;25(5):762-74. doi: 10.1101/gr.185538.114. PubMed PMID:  
799 25840857; PubMed Central PMCID: PMCPMC4417123.
- 800 43. Cromie GA, Hyma KE, Ludlow CL, Garmendia-Torres C, Gilbert TL, May P, et al.  
801 Genomic sequence diversity and population structure of *Saccharomyces cerevisiae*  
802 assessed by RAD-seq. *G3 (Bethesda)*. 2013;3(12):2163-71. doi:  
803 10.1534/g3.113.007492. PubMed PMID: 24122055; PubMed Central PMCID:  
804 PMCPMC3852379.
- 805 44. Zheng YL, Wang SA. Stress Tolerance Variations in *Saccharomyces cerevisiae*  
806 Strains from Diverse Ecological Sources and Geographical Locations. *PLoS One*.  
807 2015;10(8):e0133889. doi: 10.1371/journal.pone.0133889. PubMed PMID:  
808 26244846; PubMed Central PMCID: PMCPMC4526645.
- 809 45. Townsend JP, Cavalieri D, Hartl DL. Population genetic variation in genome-  
810 wide gene expression. *Mol Biol Evol*. 2003;20(6):955-63. doi:  
811 10.1093/molbev/msg106. PubMed PMID: 12716989.
- 812 46. Cavalieri D, Townsend JP, Hartl DL. Manifold anomalies in gene expression in  
813 a vineyard isolate of *Saccharomyces cerevisiae* revealed by DNA microarray analysis.  
814 *Proc Natl Acad Sci U S A*. 2000;97(22):12369-74. doi: 10.1073/pnas.210395297.  
815 PubMed PMID: 11035792; PubMed Central PMCID: PMCPMC17348.
- 816 47. Foss EJ, Radulovic D, Shaffer SA, Ruderfer DM, Bedalov A, Goodlett DR, et al.  
817 Genetic basis of proteome variation in yeast. *Nat Genet*. 2007;39(11):1369-75. doi:  
818 10.1038/ng.2007.22. PubMed PMID: 17952072.
- 819 48. Picotti P, Clement-Ziza M, Lam H, Campbell DS, Schmidt A, Deutsch EW, et al.  
820 A complete mass-spectrometric map of the yeast proteome applied to quantitative  
821 trait analysis. *Nature*. 2013;494(7436):266-70. doi: 10.1038/nature11835. PubMed  
822 PMID: 23334424; PubMed Central PMCID: PMCPMC3951219.
- 823 49. Parts L, Liu YC, Tekkedil MM, Steinmetz LM, Caudy AA, Fraser AG, et al.  
824 Heritability and genetic basis of protein level variation in an outbred population.  
825 *Genome Res*. 2014;24(8):1363-70. doi: 10.1101/gr.170506.113. PubMed PMID:  
826 24823668; PubMed Central PMCID: PMCPMC4120089.
- 827 50. Breunig JS, Hackett SR, Rabinowitz JD, Kruglyak L. Genetic basis of  
828 metabolome variation in yeast. *PLoS Genet*. 2014;10(3):e1004142. doi:  
829 10.1371/journal.pgen.1004142. PubMed PMID: 24603560; PubMed Central PMCID:  
830 PMCPMC3945093.
- 831 51. Zhu J, Sova P, Xu Q, Dombek KM, Xu EY, Vu H, et al. Stitching together  
832 multiple data dimensions reveals interacting metabolomic and transcriptomic  
833 networks that modulate cell regulation. *PLoS Biol*. 2012;10(4):e1001301. doi:



- 834 10.1371/journal.pbio.1001301. PubMed PMID: 22509135; PubMed Central PMCID:  
835 PMCPMC3317911 partially funded by Merck.
- 836 52. Skelly DA, Merrihew GE, Riffle M, Connelly CF, Kerr EO, Johansson M, et al.  
837 Integrative phenomics reveals insight into the structure of phenotypic diversity in  
838 budding yeast. *Genome Res.* 2013;23(9):1496-504. doi: 10.1101/gr.155762.113.  
839 PubMed PMID: 23720455; PubMed Central PMCID: PMCPMC3759725.
- 840 53. Clowers KJ, Heilberger J, Piotrowski JS, Will JL, Gasch AP. Ecological and  
841 Genetic Barriers Differentiate Natural Populations of *Saccharomyces cerevisiae*. *Mol*  
842 *Biol Evol.* 2015;32(9):2317-27. doi: 10.1093/molbev/msv112. PubMed PMID:  
843 25953281; PubMed Central PMCID: PMCPMC4540968.
- 844 54. Gallone B, Steensels J, Prahl T, Soriaga L, Saels V, Herrera-Malaver B, et al.  
845 Domestication and Divergence of *Saccharomyces cerevisiae* Beer Yeasts. *Cell.*  
846 2016;166(6):1397-410 e16. doi: 10.1016/j.cell.2016.08.020. PubMed PMID:  
847 27610566; PubMed Central PMCID: PMCPMC5018251.
- 848 55. Marullo P, Aigle M, Bely M, Masneuf-Pomarede I, Durrens P, Dubourdieu D, et  
849 al. Single QTL mapping and nucleotide-level resolution of a physiologic trait in wine  
850 *Saccharomyces cerevisiae* strains. *FEMS Yeast Res.* 2007;7(6):941-52. doi:  
851 10.1111/j.1567-1364.2007.00252.x. PubMed PMID: 17537182.
- 852 56. Meijnen JP, Randazzo P, Foulquie-Moreno MR, van den Brink J, Vandecruys P,  
853 Stojiljkovic M, et al. Polygenic analysis and targeted improvement of the complex  
854 trait of high acetic acid tolerance in the yeast *Saccharomyces cerevisiae*. *Biotechnol*  
855 *Biofuels.* 2016;9:5. doi: 10.1186/s13068-015-0421-x. PubMed PMID: 26740819;  
856 PubMed Central PMCID: PMCPMC4702306.
- 857 57. Marullo P, Bely M, Masneuf-Pomarede I, Pons M, Aigle M, Dubourdieu D.  
858 Breeding strategies for combining fermentative qualities and reducing off-flavor  
859 production in a wine yeast model. *FEMS Yeast Res.* 2006;6(2):268-79. doi:  
860 10.1111/j.1567-1364.2006.00034.x. PubMed PMID: 16487348.
- 861 58. Marullo P, Mansour C, Dufour M, Albertin W, Sicard D, Bely M, et al. Genetic  
862 improvement of thermo-tolerance in wine *Saccharomyces cerevisiae* strains by a  
863 backcross approach. *FEMS Yeast Res.* 2009;9(8):1148-60. doi: 10.1111/j.1567-  
864 1364.2009.00550.x. PubMed PMID: 19758333.
- 865 59. Benjaphokee S, Hasegawa D, Yokota D, Asvarak T, Auesukaree C, Sugiyama M,  
866 et al. Highly efficient bioethanol production by a *Saccharomyces cerevisiae* strain  
867 with multiple stress tolerance to high temperature, acid and ethanol. *N Biotechnol.*  
868 2012;29(3):379-86. doi: 10.1016/j.nbt.2011.07.002. PubMed PMID: 21820088.
- 869 60. Hose J, Yong CM, Sardi M, Wang Z, Newton MA, Gasch AP. Dosage  
870 compensation can buffer copy-number variation in wild yeast. *Elife.* 2015;4. doi:  
871 10.7554/eLife.05462. PubMed PMID: 25955966; PubMed Central PMCID:  
872 PMCPMC4448642.
- 873 61. Cherry JM, Hong EL, Amundsen C, Balakrishnan R, Binkley G, Chan ET, et al.  
874 *Saccharomyces* Genome Database: the genomics resource of budding yeast. *Nucleic*  
875 *Acids Res.* 2012;40(Database issue):D700-5. doi: 10.1093/nar/gkr1029. PubMed  
876 PMID: 22110037; PubMed Central PMCID: PMCPMC3245034.
- 877 62. Keane OM, Toft C, Carretero-Paulet L, Jones GW, Fares MA. Preservation of  
878 genetic and regulatory robustness in ancient gene duplicates of *Saccharomyces*

- 879 cerevisiae. *Genome Res.* 2014;24(11):1830-41. doi: 10.1101/gr.176792.114.  
880 PubMed PMID: 25149527; PubMed Central PMCID: PMC4216924.
- 881 63. Dowell RD, Ryan O, Jansen A, Cheung D, Agarwala S, Danford T, et al.  
882 Genotype to phenotype: a complex problem. *Science.* 2010;328(5977):469. doi:  
883 10.1126/science.1189015. PubMed PMID: 20413493; PubMed Central PMCID:  
884 PMC4412269.
- 885 64. Schacherer J, Shapiro JA, Ruderfer DM, Kruglyak L. Comprehensive  
886 polymorphism survey elucidates population structure of *Saccharomyces cerevisiae*.  
887 *Nature.* 2009;458(7236):342-5. doi: 10.1038/nature07670. PubMed PMID:  
888 19212320; PubMed Central PMCID: PMC2782482.
- 889 65. Palmqvist E, Hahn-Hägerdal B. Fermentation of lignocellulosic hydrolysates.  
890 II: inhibitors and mechanisms of inhibition. *Bioresource Technology.* 2000;74(1):25-  
891 33. doi: [http://dx.doi.org/10.1016/S0960-8524\(99\)00161-3](http://dx.doi.org/10.1016/S0960-8524(99)00161-3).
- 892 66. Connelly CF, Akey JM. On the prospects of whole-genome association  
893 mapping in *Saccharomyces cerevisiae*. *Genetics.* 2012;191(4):1345-53. doi:  
894 10.1534/genetics.112.141168. PubMed PMID: 22673807; PubMed Central PMCID:  
895 PMC3416012.
- 896 67. Diao L, Chen KC. Local ancestry corrects for population structure in  
897 *Saccharomyces cerevisiae* genome-wide association studies. *Genetics.*  
898 2012;192(4):1503-11. doi: 10.1534/genetics.112.144790. PubMed PMID:  
899 23023004; PubMed Central PMCID: PMC3512155.
- 900 68. Tang Y, Liu X, Wang J, Li M, Wang Q, Tian F, et al. GAPIT Version 2: An  
901 Enhanced Integrated Tool for Genomic Association and Prediction. *Plant Genome.*  
902 2016;9(2). doi: 10.3835/plantgenome2015.11.0120. PubMed PMID: 27898829.
- 903 69. Joo JW, Hormozdiari F, Han B, Eskin E. Multiple testing correction in linear  
904 mixed models. *Genome Biol.* 2016;17:62. doi: 10.1186/s13059-016-0903-6.  
905 PubMed PMID: 27039378; PubMed Central PMCID: PMC4818520.
- 906 70. Ober U, Ayroles JF, Stone EA, Richards S, Zhu D, Gibbs RA, et al. Using whole-  
907 genome sequence data to predict quantitative trait phenotypes in *Drosophila*  
908 *melanogaster*. *PLoS Genet.* 2012;8(5):e1002685. doi:  
909 10.1371/journal.pgen.1002685. PubMed PMID: 22570636; PubMed Central PMCID:  
910 PMC3342952.
- 911 71. Westman JO, Mapelli V, Taherzadeh MJ, Franzen CJ. Flocculation causes  
912 inhibitor tolerance in *Saccharomyces cerevisiae* for second-generation bioethanol  
913 production. *Appl Environ Microbiol.* 2014;80(22):6908-18. doi:  
914 10.1128/AEM.01906-14. PubMed PMID: 25172866; PubMed Central PMCID:  
915 PMC4249023.
- 916 72. Sarvari Horvath I, Franzen CJ, Taherzadeh MJ, Niklasson C, Liden G. Effects of  
917 furfural on the respiratory metabolism of *Saccharomyces cerevisiae* in glucose-  
918 limited chemostats. *Appl Environ Microbiol.* 2003;69(7):4076-86. PubMed PMID:  
919 12839784; PubMed Central PMCID: PMC165176.
- 920 73. Guo Z, Olsson L. Physiological response of *Saccharomyces cerevisiae* to weak  
921 acids present in lignocellulosic hydrolysate. *FEMS Yeast Res.* 2014;14(8):1234-48.  
922 doi: 10.1111/1567-1364.12221. PubMed PMID: 25331461.
- 923 74. Endo A, Nakamura T, Shima J. Involvement of ergosterol in tolerance to  
924 vanillin, a potential inhibitor of bioethanol fermentation, in *Saccharomyces*

- 925 cerevisiae. FEMS Microbiol Lett. 2009;299(1):95-9. doi: 10.1111/j.1574-  
926 6968.2009.01733.x. PubMed PMID: 19686341.
- 927 75. Kodedova M, Sychrova H. Changes in the Sterol Composition of the Plasma  
928 Membrane Affect Membrane Potential, Salt Tolerance and the Activity of Multidrug  
929 Resistance Pumps in *Saccharomyces cerevisiae*. PLoS One. 2015;10(9):e0139306.  
930 doi: 10.1371/journal.pone.0139306. PubMed PMID: 26418026; PubMed Central  
931 PMCID: PMC4587746.
- 932 76. Watts T, Khalimonchuk O, Wolf RZ, Turk EM, Mohr G, Winge DR. Mne1 is a  
933 novel component of the mitochondrial splicing apparatus responsible for processing  
934 of a COX1 group I intron in yeast. J Biol Chem. 2011;286(12):10137-46. doi:  
935 10.1074/jbc.M110.205625. PubMed PMID: 21257754; PubMed Central PMCID:  
936 PMC3060465.
- 937 77. Watari J, Kudo M, Nishikawa N, Kamimura M. Construction of Flocculent  
938 Yeast Cells (*Saccharomyces cerevisiae*) by Mating or Protoplast Fusion Using a Yeast  
939 Cell Containing the Flocculation Gene FL05. Agricultural and Biological Chemistry.  
940 1990;54(7):1677-81. doi: 10.1080/00021369.1990.10870222.
- 941 78. Jorgensen P, Nelson B, Robinson MD, Chen Y, Andrews B, Tyers M, et al. High-  
942 resolution genetic mapping with ordered arrays of *Saccharomyces cerevisiae*  
943 deletion mutants. Genetics. 2002;162(3):1091-9. PubMed PMID: 12454058;  
944 PubMed Central PMCID: PMC1462329.
- 945 79. Wanat JJ, Singh N, Alani E. The effect of genetic background on the function of  
946 *Saccharomyces cerevisiae* mlh1 alleles that correspond to HNPCC missense  
947 mutations. Hum Mol Genet. 2007;16(4):445-52. doi: 10.1093/hmg/ddl479. PubMed  
948 PMID: 17210669.
- 949 80. Young MJ, Court DA. Effects of the S288c genetic background and common  
950 auxotrophic markers on mitochondrial DNA function in *Saccharomyces cerevisiae*.  
951 Yeast (Chichester, England). 2008;25(12):903-12. doi: 10.1002/yea.1644. PubMed  
952 PMID: 19160453.
- 953 81. Sinha H, Nicholson BP, Steinmetz LM, McCusker JH. Complex genetic  
954 interactions in a quantitative trait locus. PLoS Genet. 2006;2(2):e13. doi:  
955 10.1371/journal.pgen.0020013. PubMed PMID: 16462944; PubMed Central PMCID:  
956 PMC1359075.
- 957 82. Sterken MG, Snoek LB, Kammenga JE, Andersen EC. The laboratory  
958 domestication of *Caenorhabditis elegans*. Trends Genet. 2015;31(5):224-31. doi:  
959 10.1016/j.tig.2015.02.009. PubMed PMID: 25804345; PubMed Central PMCID:  
960 PMC4417040.
- 961 83. Chandler CH, Chari S, Tack D, Dworkin I. Causes and consequences of genetic  
962 background effects illuminated by integrative genomic analysis. Genetics.  
963 2014;196(4):1321-36. doi: 10.1534/genetics.113.159426. PubMed PMID:  
964 24504186; PubMed Central PMCID: PMC3982700.
- 965 84. Vu V, Verster AJ, Schertzberg M, Chuluunbaatar T, Spensley M, Pajkic D, et al.  
966 Natural Variation in Gene Expression Modulates the Severity of Mutant Phenotypes.  
967 Cell. 2015;162(2):391-402. doi: 10.1016/j.cell.2015.06.037. PubMed PMID:  
968 26186192.
- 969 85. Glazier AM, Nadeau JH, Aitman TJ. Finding Genes That Underlie Complex  
970 Traits. Science. 2002;298(5602):2345-9. doi: 10.1126/science.1076641.

- 971 86. Moore JH, Asselbergs FW, Williams SM. Bioinformatics challenges for  
972 genome-wide association studies. *Bioinformatics*. 2010;26(4):445-55. doi:  
973 10.1093/bioinformatics/btp713. PubMed PMID: 20053841; PubMed Central  
974 PMCID: PMCPMC2820680.
- 975 87. Hu XH, Wang MH, Tan T, Li JR, Yang H, Leach L, et al. Genetic dissection of  
976 ethanol tolerance in the budding yeast *Saccharomyces cerevisiae*. *Genetics*.  
977 2007;175(3):1479-87. doi: 10.1534/genetics.106.065292. PubMed PMID:  
978 17194785; PubMed Central PMCID: PMCPMC1840089.
- 979 88. Parts L, Cubillos FA, Warringer J, Jain K, Salinas F, Bumpstead SJ, et al.  
980 Revealing the genetic structure of a trait by sequencing a population under selection.  
981 *Genome Res*. 2011;21(7):1131-8. doi: 10.1101/gr.116731.110. PubMed PMID:  
982 21422276; PubMed Central PMCID: PMCPMC3129255.
- 983 89. Katou T, Namise M, Kitagaki H, Akao T, Shimoi H. QTL mapping of sake  
984 brewing characteristics of yeast. *J Biosci Bioeng*. 2009;107(4):383-93. doi:  
985 10.1016/j.jbiosc.2008.12.014. PubMed PMID: 19332297.
- 986 90. Wenger JW, Schwartz K, Sherlock G. Bulk segregant analysis by high-  
987 throughput sequencing reveals a novel xylose utilization gene from *Saccharomyces*  
988 *cerevisiae*. *PLoS Genet*. 2010;6(5):e1000942. doi: 10.1371/journal.pgen.1000942.  
989 PubMed PMID: 20485559; PubMed Central PMCID: PMCPMC2869308.
- 990 91. Liu ZL, Slininger PJ, Dien BS, Berhow MA, Kurtzman CP, Gorsich SW. Adaptive  
991 response of yeasts to furfural and 5-hydroxymethylfurfural and new chemical  
992 evidence for HMF conversion to 2,5-bis-hydroxymethylfuran. *J Ind Microbiol*  
993 *Biotechnol*. 2004;31(8):345-52. doi: 10.1007/s10295-004-0148-3. PubMed PMID:  
994 15338422.
- 995 92. Nilsson A, Gorwa-Grauslund MF, Hahn-Hagerdal B, Liden G. Cofactor  
996 dependence in furan reduction by *Saccharomyces cerevisiae* in fermentation of acid-  
997 hydrolyzed lignocellulose. *Appl Environ Microbiol*. 2005;71(12):7866-71. doi:  
998 10.1128/AEM.71.12.7866-7871.2005. PubMed PMID: 16332761; PubMed Central  
999 PMCID: PMCPMC1317483.
- 1000 93. Liu ZL, Moon J. A novel NADPH-dependent aldehyde reductase gene from  
1001 *Saccharomyces cerevisiae* NRRL Y-12632 involved in the detoxification of aldehyde  
1002 inhibitors derived from lignocellulosic biomass conversion. *Gene*. 2009;446(1):1-10.  
1003 doi: 10.1016/j.gene.2009.06.018. PubMed PMID: 19577617.
- 1004 94. Almeida JR, Roder A, Modig T, Laadan B, Liden G, Gorwa-Grauslund MF.  
1005 NADH- vs NADPH-coupled reduction of 5-hydroxymethyl furfural (HMF) and its  
1006 implications on product distribution in *Saccharomyces cerevisiae*. *Appl Microbiol*  
1007 *Biotechnol*. 2008;78(6):939-45. doi: 10.1007/s00253-008-1364-y. PubMed PMID:  
1008 18330568.
- 1009 95. Taherzadeh MJ, Gustafsson L, Niklasson C, Liden G. Physiological effects of 5-  
1010 hydroxymethylfurfural on *Saccharomyces cerevisiae*. *Appl Microbiol Biotechnol*.  
1011 2000;53(6):701-8. PubMed PMID: 10919330.
- 1012 96. Bauer BE, Rossington D, Mollapour M, Mamnun Y, Kuchler K, Piper PW. Weak  
1013 organic acid stress inhibits aromatic amino acid uptake by yeast, causing a strong  
1014 influence of amino acid auxotrophies on the phenotypes of membrane transporter  
1015 mutants. *Eur J Biochem*. 2003;270(15):3189-95. PubMed PMID: 12869194.

- 1016 97. Hillenmeyer ME, Fung E, Wildenhain J, Pierce SE, Hoon S, Lee W, et al. The  
1017 chemical genomic portrait of yeast: uncovering a phenotype for all genes. *Science*.  
1018 2008;320(5874):362-5. doi: 10.1126/science.1150021. PubMed PMID: 18420932;  
1019 PubMed Central PMCID: PMCPMC2794835.
- 1020 98. Hou L. Novel methods of genome shuffling in *Saccharomyces cerevisiae*.  
1021 *Biotechnol Lett*. 2009;31(5):671-7. doi: 10.1007/s10529-009-9916-5. PubMed  
1022 PMID: 19153667.
- 1023 99. Wang H, Hou L. Genome shuffling to improve fermentation properties of top-  
1024 fermenting yeast by the improvement of stress tolerance. *Food Science and*  
1025 *Biotechnology*. 2010;19(1):145-50. doi: 10.1007/s10068-010-0020-3.
- 1026 100. Snoek T, Picca Nicolino M, Van den Bremt S, Mertens S, Saels V, Verplaetse A,  
1027 et al. Large-scale robot-assisted genome shuffling yields industrial *Saccharomyces*  
1028 *cerevisiae* yeasts with increased ethanol tolerance. *Biotechnol Biofuels*. 2015;8:32.  
1029 doi: 10.1186/s13068-015-0216-0. PubMed PMID: 25759747; PubMed Central  
1030 PMCID: PMCPMC4354739.
- 1031 101. Brachmann CB, Davies A, Cost GJ, Caputo E, Li J, Hieter P, et al. Designer  
1032 deletion strains derived from *Saccharomyces cerevisiae* S288C: a useful set of  
1033 strains and plasmids for PCR-mediated gene disruption and other applications.  
1034 *Yeast (Chichester, England)*. 1998;14(2):115-32. doi: 10.1002/(SICI)1097-  
1035 0061(19980130)14:2<115::AID-YEA204>3.0.CO;2-2. PubMed PMID: 9483801.
- 1036 102. Alexander WG, Doering DT, Hittinger CT. High-efficiency genome editing and  
1037 allele replacement in prototrophic and wild strains of *Saccharomyces*. *Genetics*.  
1038 2014;198(3):859-66. doi: 10.1534/genetics.114.170118. PubMed PMID: 25209147;  
1039 PubMed Central PMCID: PMCPMC4224175.
- 1040 103. Steinmetz LM, Sinha H, Richards DR, Spiegelman JI, Oefner PJ, McCusker JH,  
1041 et al. Dissecting the architecture of a quantitative trait locus in yeast. *Nature*.  
1042 2002;416(6878):326-30. doi: 10.1038/416326a. PubMed PMID: 11907579.
- 1043 104. Xiao W. *Yeast protocols*: Springer; 2006.
- 1044 105. Engel SR, Dietrich FS, Fisk DG, Binkley G, Balakrishnan R, Costanzo MC, et al.  
1045 The reference genome sequence of *Saccharomyces cerevisiae*: then and now. *G3*  
1046 (Bethesda). 2014;4(3):389-98. doi: 10.1534/g3.113.008995. PubMed PMID:  
1047 24374639; PubMed Central PMCID: PMCPMC3962479.
- 1048 106. Li H. Aligning sequence reads, clone sequences and assembly contigs with  
1049 BWA-MEM.  
1050 eprint arXiv:13033997. 2013.
- 1051 107. McKenna A, Hanna M, Banks E, Sivachenko A, Cibulskis K, Kernysky A, et al.  
1052 The Genome Analysis Toolkit: a MapReduce framework for analyzing next-  
1053 generation DNA sequencing data. *Genome Res*. 2010;20(9):1297-303. doi:  
1054 10.1101/gr.107524.110. PubMed PMID: 20644199; PubMed Central PMCID:  
1055 PMCPMC2928508.
- 1056 108. Danecek P, Auton A, Abecasis G, Albers CA, Banks E, DePristo MA, et al. The  
1057 variant call format and VCFtools. *Bioinformatics*. 2011;27(15):2156-8. doi:  
1058 10.1093/bioinformatics/btr330. PubMed PMID: 21653522; PubMed Central PMCID:  
1059 PMCPMC3137218.
- 1060 109. Cingolani P, Platts A, Wang le L, Coon M, Nguyen T, Wang L, et al. A program  
1061 for annotating and predicting the effects of single nucleotide polymorphisms,

1062 SnpEff: SNPs in the genome of *Drosophila melanogaster* strain w1118; iso-2; iso-3.  
1063 Fly (Austin). 2012;6(2):80-92. doi: 10.4161/fly.19695. PubMed PMID: 22728672;  
1064 PubMed Central PMCID: PMCPMC3679285.  
1065 110. Jombart T, Ahmed I. adegenet 1.3-1: new tools for the analysis of genome-  
1066 wide SNP data. *Bioinformatics*. 2011;27(21):3070-1. doi:  
1067 10.1093/bioinformatics/btr521. PubMed PMID: 21926124; PubMed Central PMCID:  
1068 PMCPMC3198581.  
1069 111. Gao X, Starmer J, Martin ER. A multiple testing correction method for genetic  
1070 association studies using correlated single nucleotide polymorphisms. *Genet*  
1071 *Epidemiol*. 2008;32(4):361-9. doi: 10.1002/gepi.20310. PubMed PMID: 18271029.  
1072 112. Gao X, Becker LC, Becker DM, Starmer JD, Province MA. Avoiding the high  
1073 Bonferroni penalty in genome-wide association studies. *Genet Epidemiol*.  
1074 2010;34(1):100-5. doi: 10.1002/gepi.20430. PubMed PMID: 19434714; PubMed  
1075 Central PMCID: PMCPMC2796708.

1076  
1077  
1078  
1079

## FIGURE LEGENDS

1080 **Fig 1. Genetic diversity found in the 165-strain collection.** The entire  
1081 collection of high quality SNPs (486,302) was used as input for principal  
1082 component analysis (PCA) (A) and to generate a neighbor-joining (NJ) tree (B).  
1083 Populations assigned in circles were defined manually using published  
1084 population structure data. Strains are color-coded according to genetic similarity,  
1085 with matching colors between the PCA and NJ tree (generated by Adegnet  
1086 [110]). The population and/or niche is represented by the key, with the number  
1087 of strains in each group indicated in parentheses.

1088

1089 **Fig 2. Strain-specific difference for SynH and HT tolerance.** Tolerance to  
1090 lignocellulosic hydrolysate across strains (left) and across each population (right)  
1091 measured as glucose consumption in SynH (A) and HT tolerance based on  
1092 glucose consumption were calculated as described in Methods for 165 strains.

1093 Individual strains were ordered based on the quantitative scores in (A).  
1094 Population distributions shown in the boxplots are indicated for named  
1095 populations from Fig 1.

1096 **Fig 3. Distribution of SNP alleles.** (A) A heat map of the 38 SNPs found in the  
1097 GWA analysis (columns) in each strain (rows), where the alleles associated with  
1098 the sensitive or resistance phenotypes are color-coded according to the key.  
1099 Strains were organized from tolerant (top) to sensitive (bottom). (B) Percent  
1100 glucose consumed in SynH + HTs was plotted against the number of sensitive  
1101 alleles identified in each strain. Correlation of the two is indicated by the  $R^2$  and  
1102 linear fit line.

1103 **Fig 4. Knockout effects of genes containing SNPs found in GWA.** Genes  
1104 linked to SNPs implicated by GWA were deleted in one or two genetic  
1105 backgrounds, tolerant strain YPS128 (A) and sensitive strain YJM1444 (B).  
1106 Significance was determined by paired T-test (where experiments were paired by  
1107 replicate date, see Methods) with FDR correction compared to respective wild  
1108 type strain. Asterisks indicate  $FDR < 0.05$  or  $p < 0.05$  (which corresponds to FDR  
1109 of ~13%), according to the key. Deletion strains in (B) are ordered as in (A); NA  
1110 indicates missing data due our inability to make the gene deletion in that  
1111 background. *zrt1-adh4Δ* indicates the deletion of an intergenic sequence  
1112 between these genes.

1113 **Fig 5. LEU3 is important for SynH tolerance.** (A) Wild-type YPS128 and a  
1114 YPS128 *leu3Δ* mutant were grown in Synthetic Complete medium (SC), SynH

1115 without toxins (SynH -HT), or SynH with toxins, and final OD<sub>600</sub> was measured  
1116 after 24 hours. (B) Final OD<sub>600</sub> was also measured in strains grown in media with  
1117 10X SC concentration of branched amino acids (leucine, isoleucine, and valine)  
1118 in SynH -HT and SynH. Data represent average of 3 replicates with standard  
1119 deviation. Significance was determined by paired t-test.

1120

1121 **Fig 6. Increased SynH performance in the *mne1Δ* mutant is independent of**  
1122 **oxygen availability.** Wild type YPS128 and the *mne1Δ* mutant were grown  
1123 anaerobically as described in Methods, and media was sampled over time to  
1124 determine (A) cell density, (B) glucose consumption, and (C) ethanol production  
1125 over time. Plots represent the average and standard deviation of 3 replicates.

1126

1127 **Fig 7. Little allele-specific contribution to SynH tolerance.** (A) YPS128  
1128 strains lacking individual genes were complemented with a plasmid carrying the  
1129 tolerant allele (T) or the sensitive allele (S) of each gene. Cells were grown in  
1130 synthetic complete medium (SC) with HTs and nourseothricin (NAT) to allow for  
1131 drug-based plasmid selection. Significance was determined by paired t-test  
1132 comparing strains carrying the tolerant versus sensitive allele. Data represent  
1133 the average and standard deviation of three replicates. (B) Relative phenotype  
1134 based on reciprocal hemizyosity analysis (RHA) where the ratio of glucose  
1135 consumption of strains carrying the tolerant versus sensitive allele was calculated  
1136 across 7 biological replicates. (C) Relative percent glucose consumed in wild-



1137 type YJM144 x YPS128 hybrid and homozygous deletion strains compared to the  
1138 average of the wild-type YJM144 x YPS128 hybrids, in SynH as described in  
1139 Methods. Data represent the average and standard deviation of three replicates.  
1140 One of the *bnaf1* cultures did not grow; the other two replicates looked  
1141 indistinguishable from the wild-type culture. (D) Phenotypic improvement  
1142 achieved by crossing strains with diverse phenotypic and genetic characteristics  
1143 was investigated by measuring percent of glucose consumption in SynH.  
1144 Significance was determined by paired t-test comparing each hybrid and the  
1145 most tolerant strain, YPS128.

1146

#### 1147 **Supporting information**

1148 **S1 Figure. Strain-specific differences in SynH and HT tolerance.** Tolerance  
1149 to lignocellulosic hydrolysate across strains (left) and summarized within each  
1150 population (right) measured as final OD<sub>600</sub> in SynH (A) and HT tolerance (B)  
1151 (based the ratio of final OD<sub>600</sub> in cultures grown with versus without toxins).  
1152 Strains were ordered as in (A). Population names for boxplots are listed in Fig 1.

1153

#### 1154 **S2 Figure. Allele frequency of significant SNPs found through GWA.**

1155 Distribution of the minor allele frequency of 76 SNPs is shown.

1156

#### 1157 **S3 Figure. Distribution of tolerant and sensitive allele based on population.**

1158 A heat map of the 38 SNPs found in the GWA analysis (columns) in each strain  
1159 (rows), where the alleles associated with the sensitive or resistance phenotypes

1160 are color-coded according to the key. Strains were grouped based on their  
1161 ancestral population as indicated in the figure; Wine, Asian, NA (North American),  
1162 WA (West African), and MOS (mosaic).

1163

1164 **S4 Figure. Knockout effects of genes containing SNPs found in GWA when**  
1165 **cells were grown in rich medium.** The phenotypic impact of genes affected by  
1166 SNPs found in GWA was tested in rich lab medium (YPD). Average and  
1167 standard deviation of 5 replicates is shown. Significance was determined by  
1168 paired t-test compared to wild type strain.

1169

1170 **S5 Figure. Deletion of *MNE1* significantly increases fermentation rates in**  
1171 **SynH.** Effects of the *MNE1* deletion in YPS128 were measured in cells growing  
1172 in flasks. We observed increased glucose consumption (A), higher production of  
1173 ethanol (B), and higher production of ethanol per cell (C). Average and standard  
1174 deviation of 3 replicates is shown. Significance was determined by paired t-test  
1175 compared to wild type strain.

1176

1177 **S6 Figure. Deletion of *FLO1* significantly increases YJM1444 glucose**  
1178 **consumption in SynH.** Effects of the *FLO1* deletion in YPS128 and YJM1444  
1179 were measured in cells growing in flasks. This single deletion increased  
1180 YJM1444 glucose consumption in SynH to the level seen in YPS128.  
1181 Significance was determined by paired t-test compared to wild type strain.

1182

1183 **S7 Figure. Increased tolerance to SynH is specific to the *FLO1* deletion.**

1184 Deletion of *FLO5*, the paralog of *FLO1*, did not decrease flocculation (not shown)  
1185 or increase growth in SynH.

1186

1187 **S8 Figure. Deletion of *MNE1* improves glucose consumption in SynH in**

1188 **multiple genetic backgrounds. (A)** Effect of *MNE1* deletion on glucose  
1189 consumption in SynH was measured in YJM1444 and the ethanol red strain (E.  
1190 Red) by growing cells in flasks and measuring percent of glucose consumed after  
1191 24 hours. Significance was determined by paired t-test compared to wild type  
1192 strain. Red asterisk symbolizes  $P < 0.01$ . **(B)** Flocculation differences in haploid  
1193 strains (left), and three independently made crosses of YPS128 and YJM1444  
1194 from the designated mating types. Cultures were grown in tubes to saturation  
1195 and cells allowed to sit briefly without shaking. These culture conditions  
1196 exacerbate the amount of flocculation for easy visualization. The YJM1444  
1197 haploid is highlight flocculant under these conditions (visualized as clear media  
1198 with cell precipitate at the bottom of the tube) whereas multiple independently  
1199 made hybrids are no longer flocculant.

1200

1201 **S9 Figure. Plasmid complementation carrying tolerant and sensitive allele**

1202 **in SynH.** YPS128 deletion mutants were transformed with an empty plasmid  
1203 (pKI), a plasmid carrying the tolerant allele (pT), or a plasmid carrying the  
1204 sensitive allele (pS). Cells were grown in SynH, which does not allow the use  
1205 antibiotics due to the presence of ammonium sulfate in the medium. Although

1206 most cells likely retain the plasmid over the duration of this experiment, we were  
1207 unable to detect allele-specific effects that overcome the variation in the  
1208 experiments.

1209

1210 **S1 Table. Strain information**

1211

1212 **S2 Table. Summary of SNPs and predicted impacts.** SNP classifications

1213 were performed by SnpEff as outlined in Methods. Low impact genic

1214 polymorphisms are represented by synonymous codon changes, moderate

1215 impact genic SNPs are nonsynonymous codon changes, and high impact

1216 variants include introduction of premature stop codons, altered start position, or

1217 interruptions of slicing regions.

1218

1219 **S3 Table. List of genes with high impact mutations.**

1220

1221 **S4 Table. Initial identification of SNPs correlated with SynH tolerance.**

1222 Initial set of SNPs whose p-value passed our threshold in any of the GWA are

1223 shown, ranked by significance. Phenotypes to which the SNP was associated

1224 are listed in the first column; (1) Final OD<sub>600</sub> in SynH, (2) Percent of glucose

1225 consumed in SynH, (3) HT tolerance based on OD<sub>600</sub>, (4) HT tolerance based on

1226 glucose consumed. SNPs identified in multiple GWA, the most significant p-value

1227 is listed in the last column. SNP type was determined by SnpEff: syn,

1228 synonymous; mis, missense; int, intergenic.

1229

1230 **S5 Table. Plasmids with tolerant and sensitive alleles.** Strain genotype

1231 sources for cloning of tolerant and sensitive allele for plasmid complementation

1232 are shown.

1233

1234 **S6 Table. Strains used for RHA between YPS128 and YJM1444 to test**

1235 **alleles found in GWAS.** The type of allele that is tested in each hybrid is

1236 labeled as sensitive (S) and tolerant (T).

1237

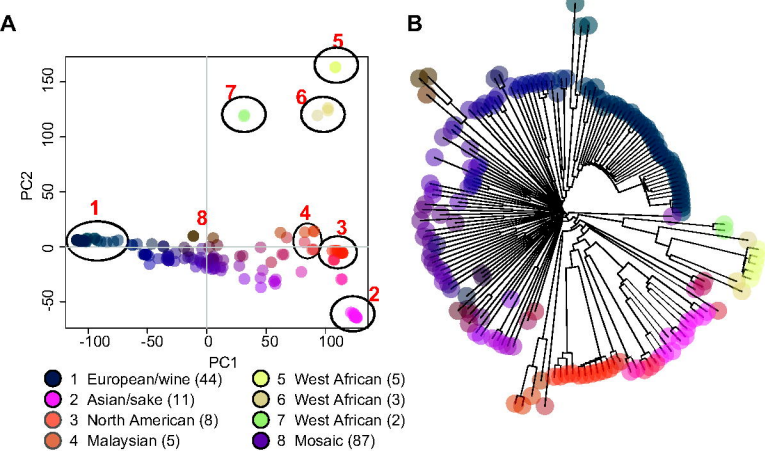

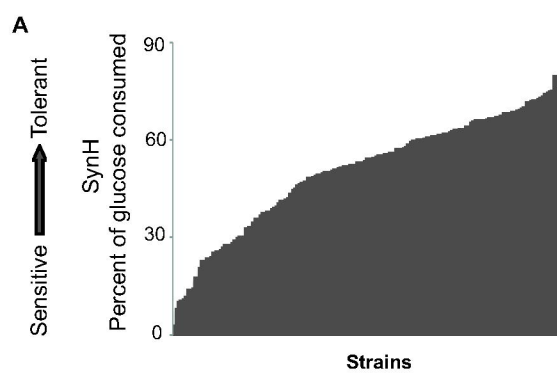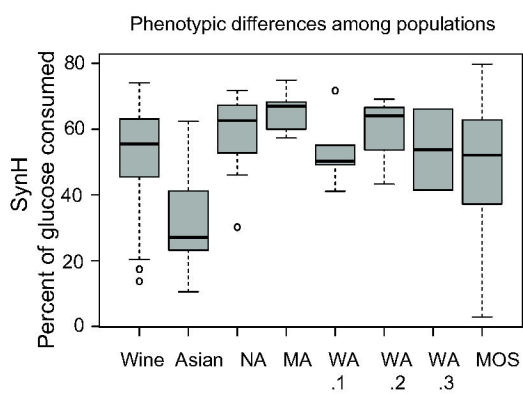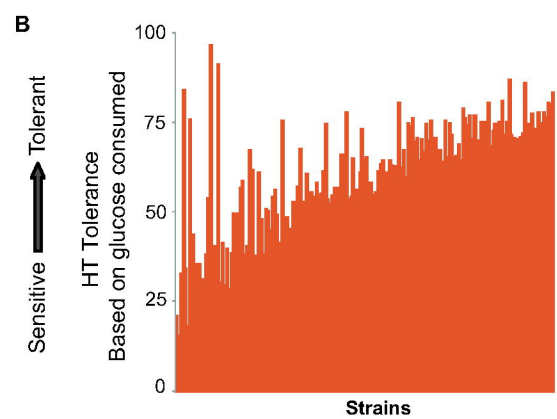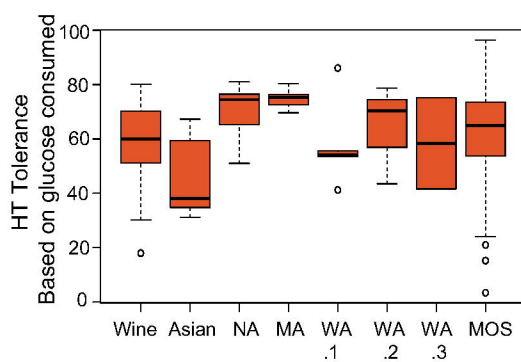

A

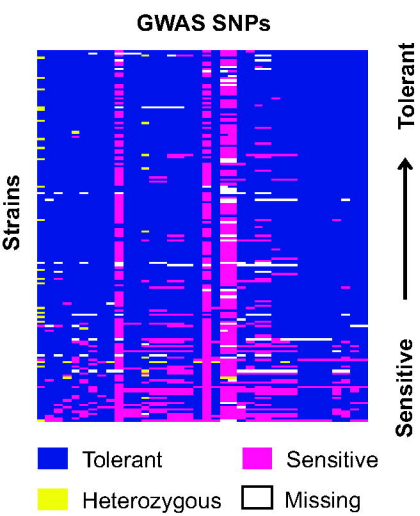

B

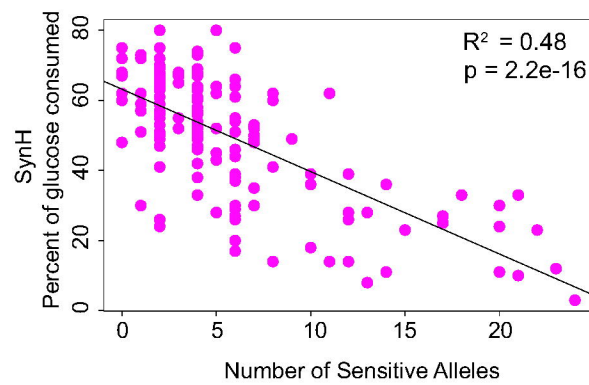



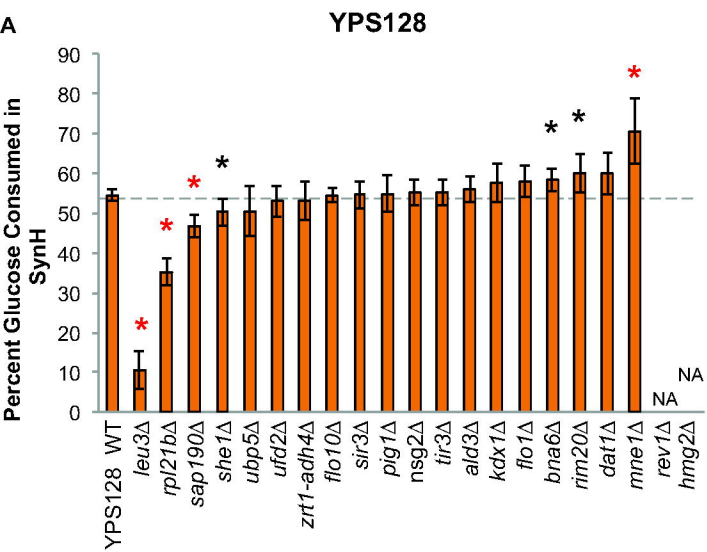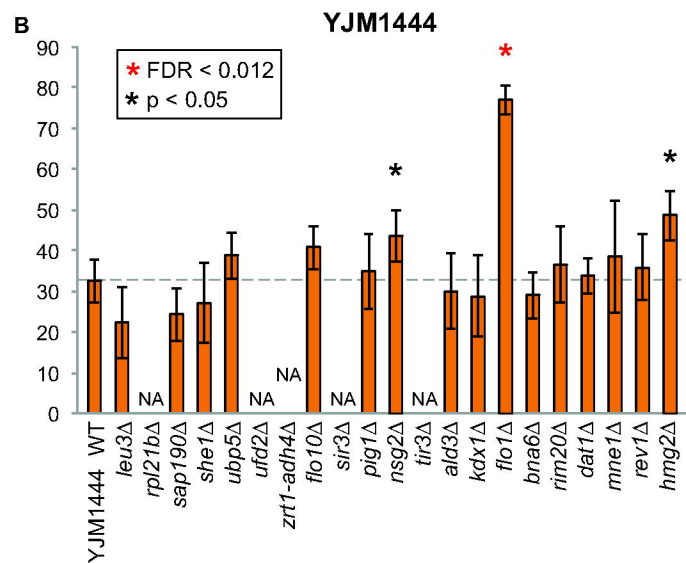

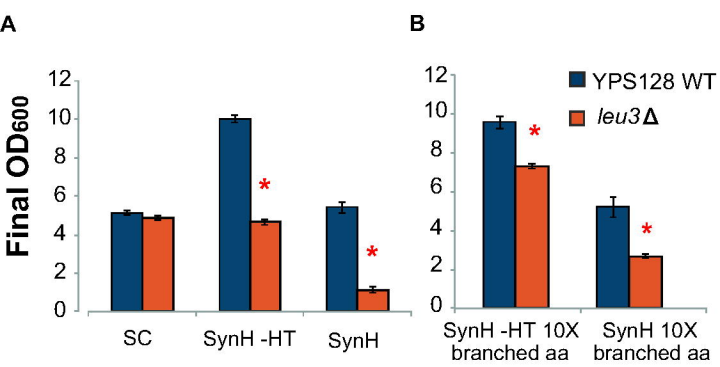

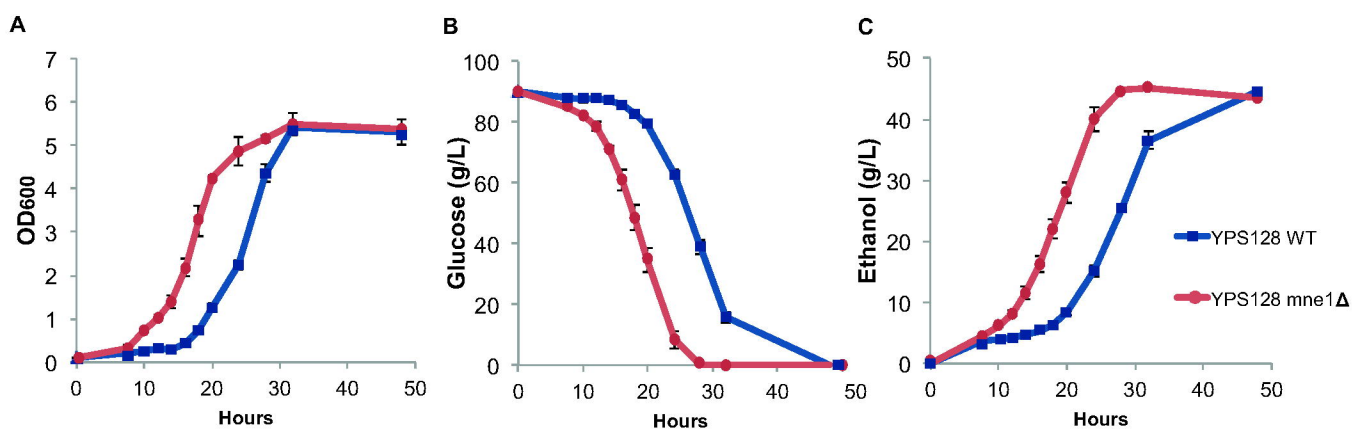

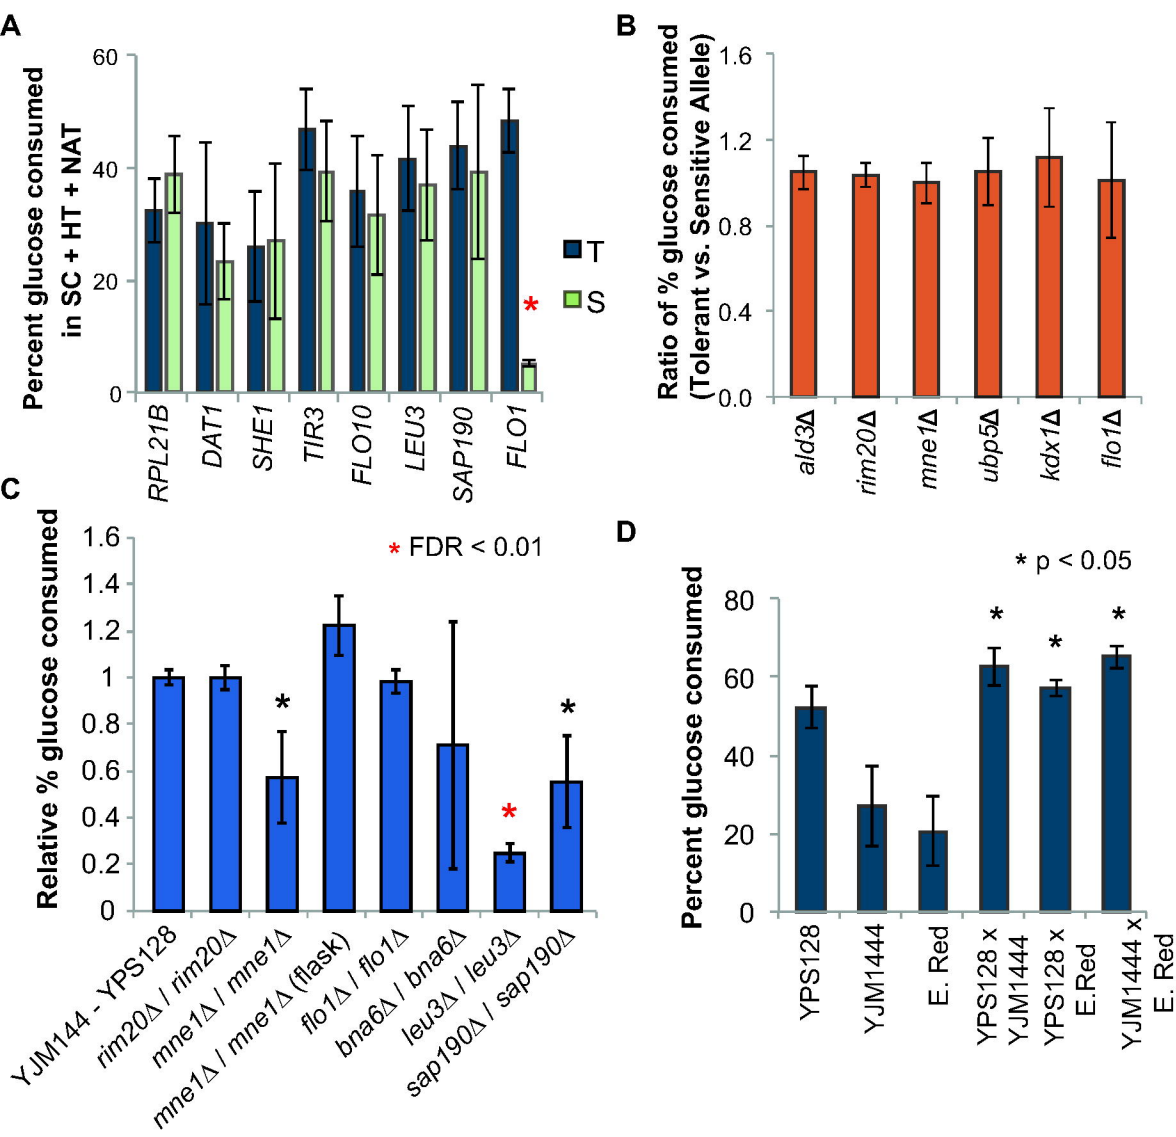

Source: https://www.biorxiv.org/content/10.1101/241257v1.full.pdf
